# Supplementary material
Source: PubMed Central journal article supplement (PMC2892910)
Supplement: NIHMS212302-supplement-1_si_001.pdf [file NIHMS212302-supplement-1_si_001.pdf]

## Supporting Information

# Asymmetric Synthesis of D-ribo-Phytosphingosine from 1-Tetradecyne and (4-Methoxyphenoxy)acetaldehyde

Zheng Liu, Hoe-Sup Byun, and Robert Bittman\*

Department of Chemistry and Biochemistry, Queens College of The City University  
of New York, Flushing, New York 11367-1597

Robert.Bittman@qc.cuny.edu

### Table of Content

|                                                                                             |        |
|---------------------------------------------------------------------------------------------|--------|
| General Experimental Methods                                                                | S3     |
| <sup>1</sup> H and <sup>13</sup> C NMR of <b>10</b>                                         | S4-5   |
| <sup>1</sup> H and <sup>13</sup> C NMR of <b>11</b>                                         | S6-7   |
| <sup>1</sup> H and <sup>13</sup> C NMR of <b>8</b>                                          | S8-9   |
| <sup>1</sup> H and <sup>13</sup> C NMR of ( <i>S</i> )- <b>6</b>                            | S10-11 |
| <sup>1</sup> H NMR of ( <i>R</i> )- and ( <i>S</i> )-MTPA of ( <i>S</i> )- <b>6</b>         | S12    |
| MTPA Ester Chemical Shifts of ( <i>R</i> )- and ( <i>S</i> )-MTPA of ( <i>S</i> )- <b>6</b> | S13    |
| <sup>1</sup> H and <sup>13</sup> C NMR of ( <i>R</i> )- <b>6</b>                            | S14-15 |
| <sup>1</sup> H NMR of ( <i>R</i> )- and ( <i>S</i> )-MTPA of ( <i>R</i> )- <b>6</b>         | S16    |
| MTPA Ester Chemical Shifts of ( <i>R</i> )- and ( <i>S</i> )-MTPA of ( <i>R</i> )- <b>6</b> | S17    |
| <sup>1</sup> H and <sup>13</sup> C NMR of <i>anti</i> - <b>5</b>                            | S18-19 |
| <sup>1</sup> H NMR of ( <i>R</i> )- and ( <i>S</i> )-MTPA of <i>anti</i> - <b>5</b>         | S20    |
| MTPA Ester Chemical Shifts of ( <i>R</i> )- and ( <i>S</i> )-MTPA of <i>anti</i> - <b>5</b> | S21    |
| <sup>1</sup> H and <sup>13</sup> C NMR of <i>syn</i> - <b>5</b>                             | S22-23 |
| <sup>1</sup> H NMR of ( <i>R</i> )- and ( <i>S</i> )-MTPA of <i>syn</i> - <b>5</b>          | S24    |
| MTPA Ester Chemical Shifts of ( <i>R</i> )- and ( <i>S</i> )-MTPA of <i>syn</i> - <b>5</b>  | S25    |
| <sup>1</sup> H and <sup>13</sup> C NMR of <b>13</b>                                         | S26-27 |
| <sup>1</sup> H - <sup>1</sup> H COSY NMR of <b>13</b>                                       | S28    |
| <sup>1</sup> H NMR of ( <i>R</i> )- and ( <i>S</i> )- <b>18</b>                             | S29    |

|                                                                                 |        |
|---------------------------------------------------------------------------------|--------|
| MTPA Ester Chemical Shifts of ( <i>R</i> )- and ( <i>S</i> )- <b>18</b>         | S30    |
| <sup>1</sup> H and <sup>13</sup> C NMR of <b>3</b>                              | S31-32 |
| <sup>1</sup> H and <sup>13</sup> C NMR of <b>14</b>                             | S33-34 |
| <sup>1</sup> H and <sup>13</sup> C NMR of <b>15</b>                             | S35-36 |
| <sup>1</sup> H and <sup>13</sup> C NMR of <b>15'</b> and <i>ent</i> - <b>15</b> | S37-38 |
| <sup>1</sup> H and <sup>13</sup> C NMR of <b>19</b>                             | S39-40 |
| <sup>1</sup> H NMR of ( <i>R</i> )- and ( <i>S</i> )- <b>21</b>                 | S41    |
| MTPA Amide Chemical Shifts of ( <i>R</i> )- and ( <i>S</i> )- <b>21</b>         | S42    |
| <sup>1</sup> H and <sup>13</sup> C NMR of <b>22</b>                             | S43-44 |
| <sup>1</sup> H and <sup>13</sup> C NMR of <b>1</b>                              | S45-46 |
| <sup>1</sup> H and <sup>13</sup> C NMR of <b>23</b>                             | S47-48 |
| <sup>1</sup> H and <sup>13</sup> C NMR of <b>4</b>                              | S49-50 |

## General Experimental Methods

All reactions were carried out under a dry nitrogen atmosphere using oven-dried glassware and magnetic stirring. The solvents were dried as follows: THF was heated at reflux over sodium benzophenone ketyl; toluene was heated at reflux over sodium; CH<sub>2</sub>Cl<sub>2</sub> were dried over CaH<sub>2</sub>. Silica gel 60 F254 aluminum TLC plates of 0.2 mm thickness were used to monitor the reactions. The spots were visualized with short wavelength ultraviolet light or by charring after spraying with 15% H<sub>2</sub>SO<sub>4</sub>. Flash chromatography was carried out with silica gel 60(230-400 ASTM mesh). <sup>1</sup>H NMR spectra were obtained on 400 or 500 MHz spectrometers. Chemical shifts were referenced on residual solvent peaks: CDCl<sub>3</sub> (δ = 7.26 ppm for <sup>1</sup>H NMR and 77.00 ppm for <sup>13</sup>C NMR), CD<sub>3</sub>OD (δ = 4.78, 3.31 ppm for <sup>1</sup>H NMR and 49.1 ppm for <sup>13</sup>C NMR). Optical rotations were measured at room temperature in a 1.0-dm cell. High-resolution mass spectra were acquired by electrospray ionization.

1.2693  
1.2872  
1.3050

3.7285  
3.7485

4.1751  
4.1929  
4.2107  
4.2286

4.6141  
4.6194  
4.6243  
4.6296

6.1582  
6.1633  
6.1685  
6.1975  
6.2027  
6.2079

6.8012  
6.8052  
6.8135  
6.8274  
6.8295  
6.8434  
6.8521  
6.8558  
7.0277  
7.0379  
7.0480  
7.0671  
7.0772  
7.0874

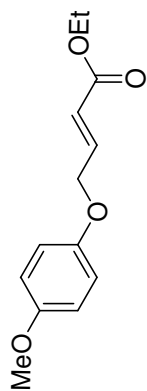

<sup>1</sup>H NMR (400 MHz, CDCl<sub>3</sub>) 10

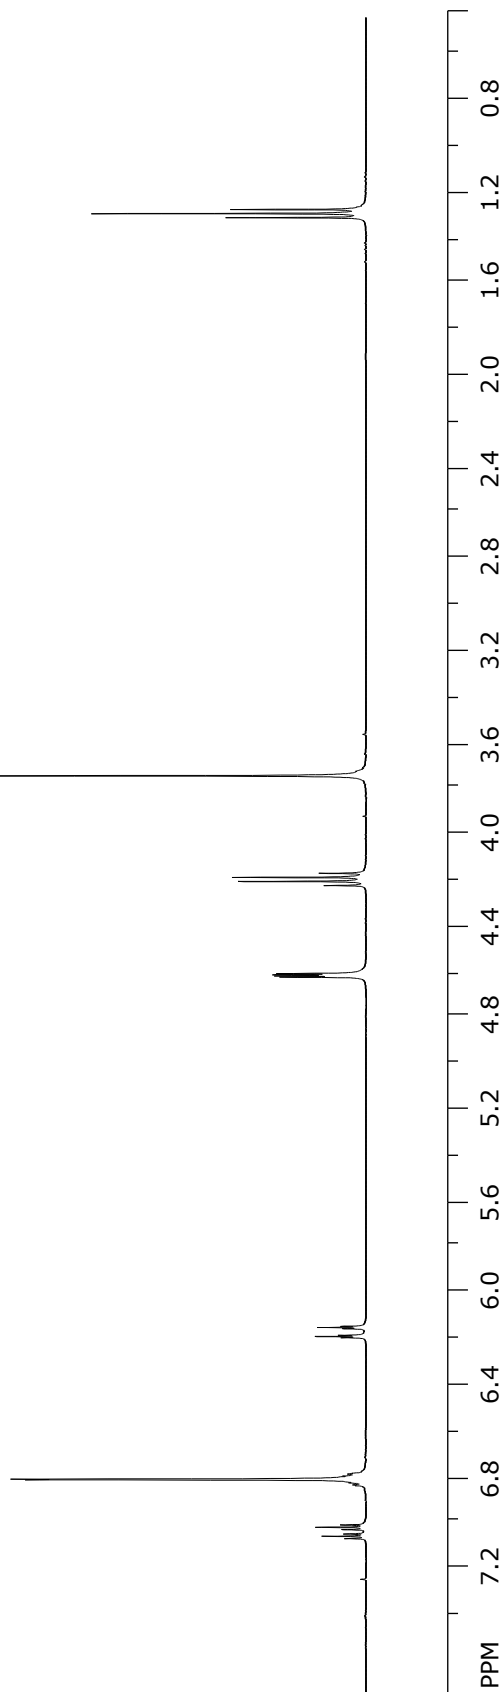

file: E:\NMR-400(new)-LZ\zh-hb-26\10\fid exp: <zg30>  
transmitter freq.: 400.132471 MHz  
time domain size: 65536 points  
width: 8278.15 Hz = 20.6885 ppm = 0.126314 Hz/pt  
number of scans: 16

freq. of 0 ppm: 400.130007 MHz  
processed size: 32768 complex points  
LB: 0.300 GF: 0.0000  
Hz/cm: 117.461 ppm/cm: 0.29356

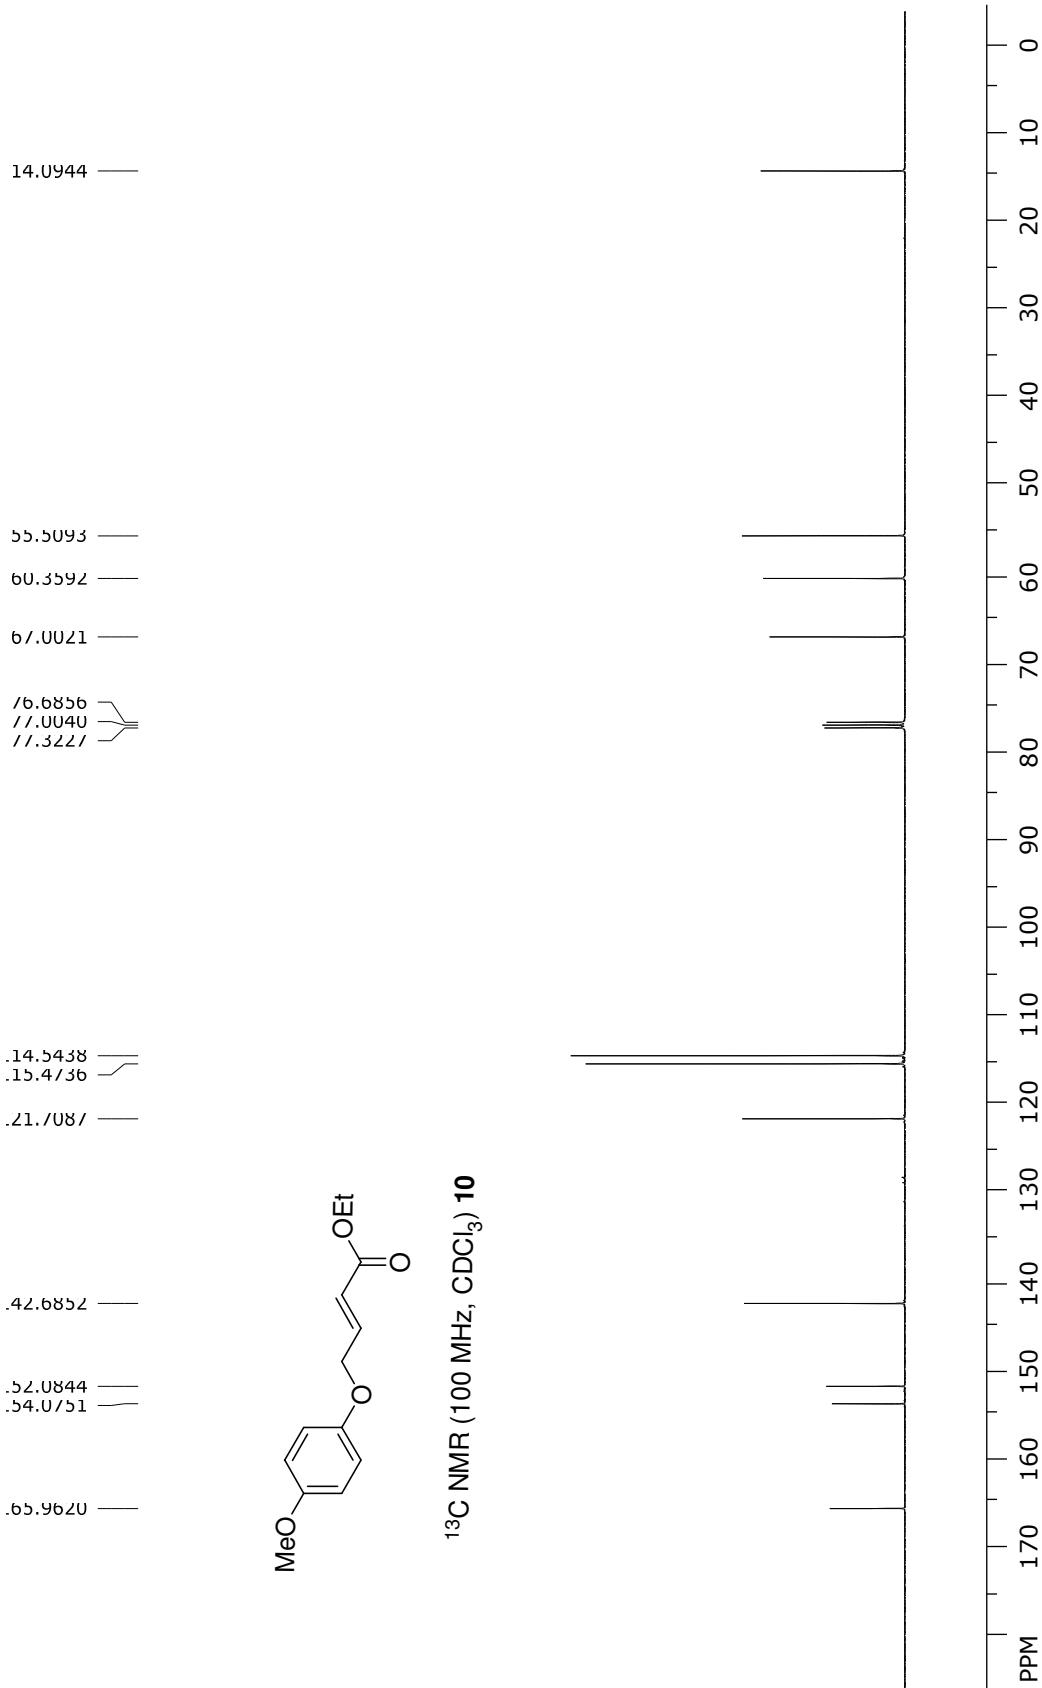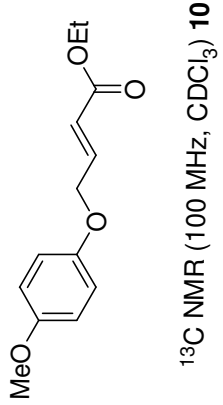

file: E:\NMR-400(new)-LZ\zh-hb-26\11\fid exp: <zpgg30>  
 transmitter freq.: 100.622830 MHz  
 time domain size: 65536 points  
 width: 23980.82 Hz = 238.3238 ppm = 0.365918 Hz/pt  
 number of scans: 4096

freq. of 0 ppm: 100.612783 MHz  
 processed size: 32768 complex points  
 LB: 1.000 GF: 0.0000  
 Hz/cm: 766.134 ppm/cm: 7.61391

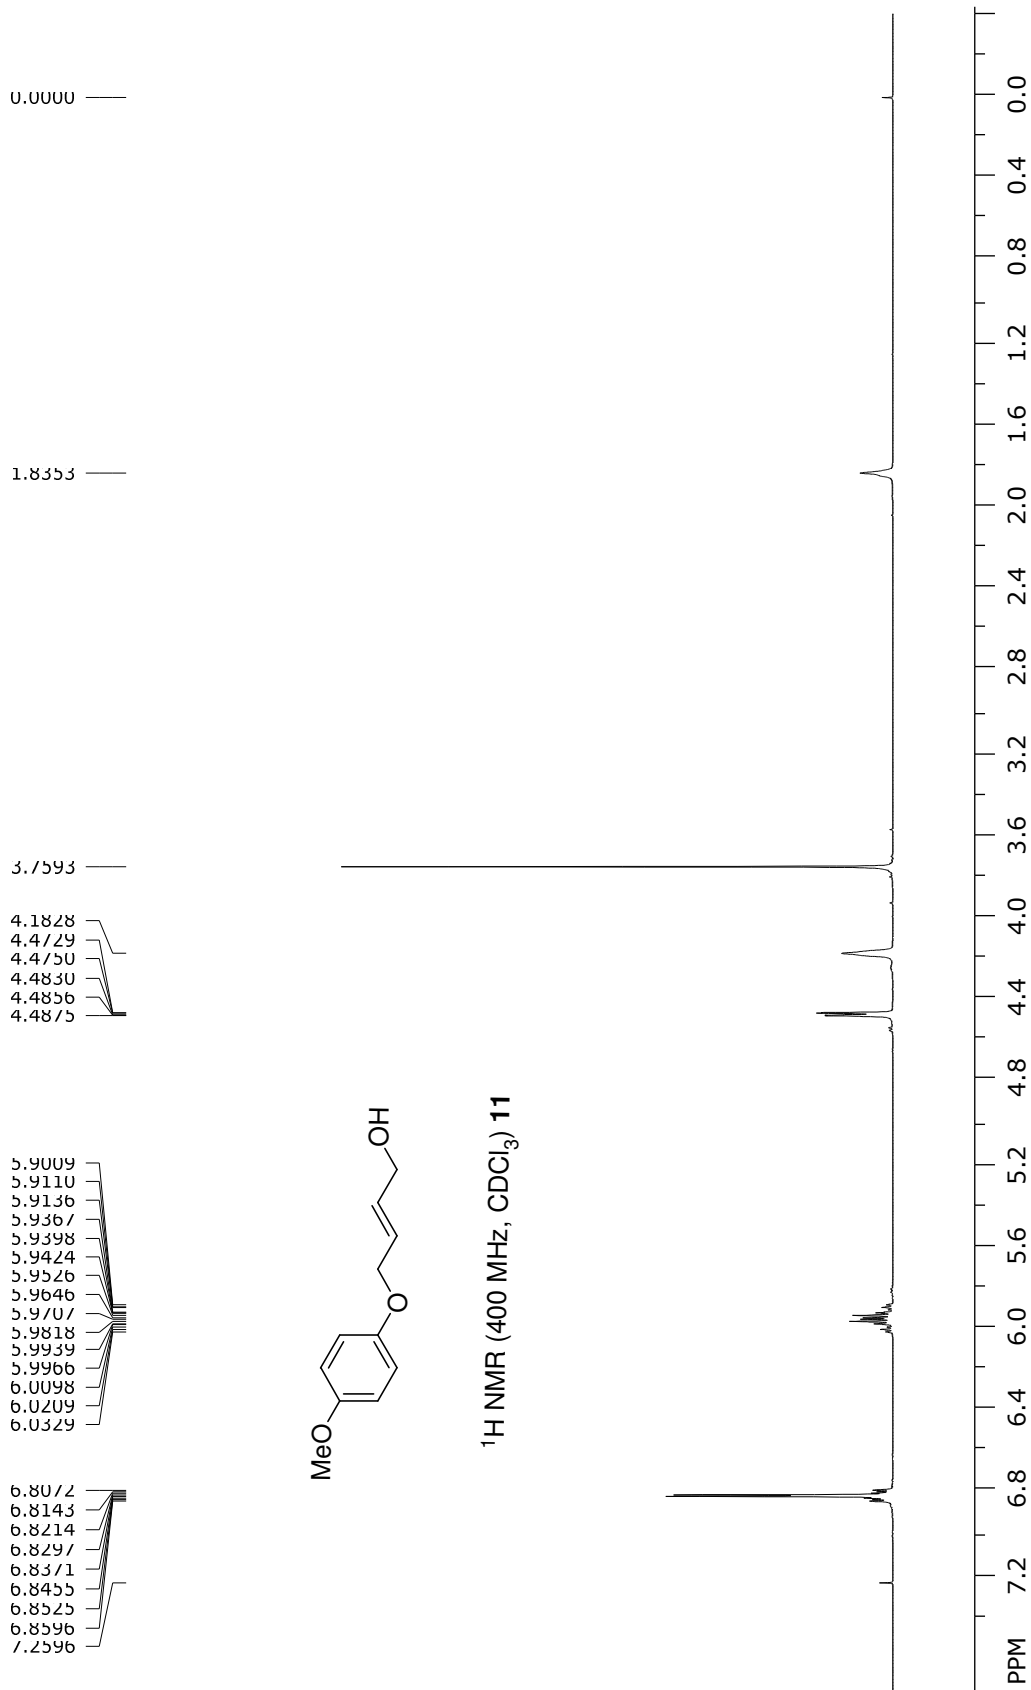

file: E:\NMR-400(new)-LZ\zh-hb-12\10\fid exp: <zg30>  
 transmitter freq.: 400.132471 MHz  
 time domain size: 65536 points  
 width: 8278.15 Hz = 20.6885 ppm = 0.126314 Hz/pt  
 number of scans: 16

freq. of 0 ppm: 400.130010 MHz  
 processed size: 32768 complex points  
 LB: 0.300 GF: 0.0000  
 Hz/cm: 131.153 ppm/cm: 0.32777

55.6532  
62.7818  
68.4534  
76.6872  
77.0044  
77.3226

114.5674  
115.5888

126.3547

132.6760

152.5647  
153.8359

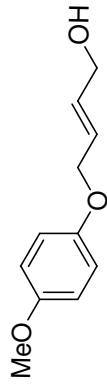

<sup>13</sup>C NMR (100 MHz, CDCl<sub>3</sub>) 11

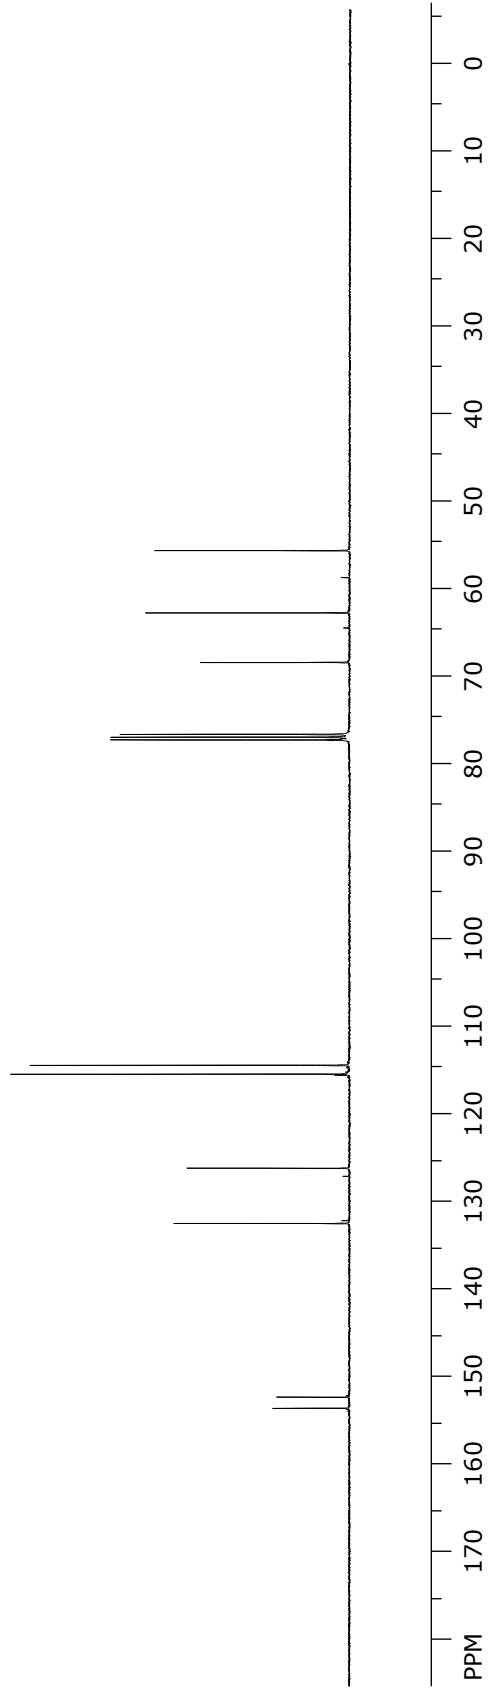

file: E:\NMR-400(new)-LZ\zh-hb-12\11\fid exp: <zpgg30>  
transmitter freq.: 100.622830 MHz  
time domain size: 65536 points  
width: 23980.82 Hz = 238.3238 ppm = 0.365918 Hz/pt  
number of scans: 4096  
freq. of 0 ppm: 100.612777 MHz  
processed size: 32768 complex points  
LB: 1.000 GF: 0.0000  
Hz/cm: 772.396 ppm/cm: 7.67615

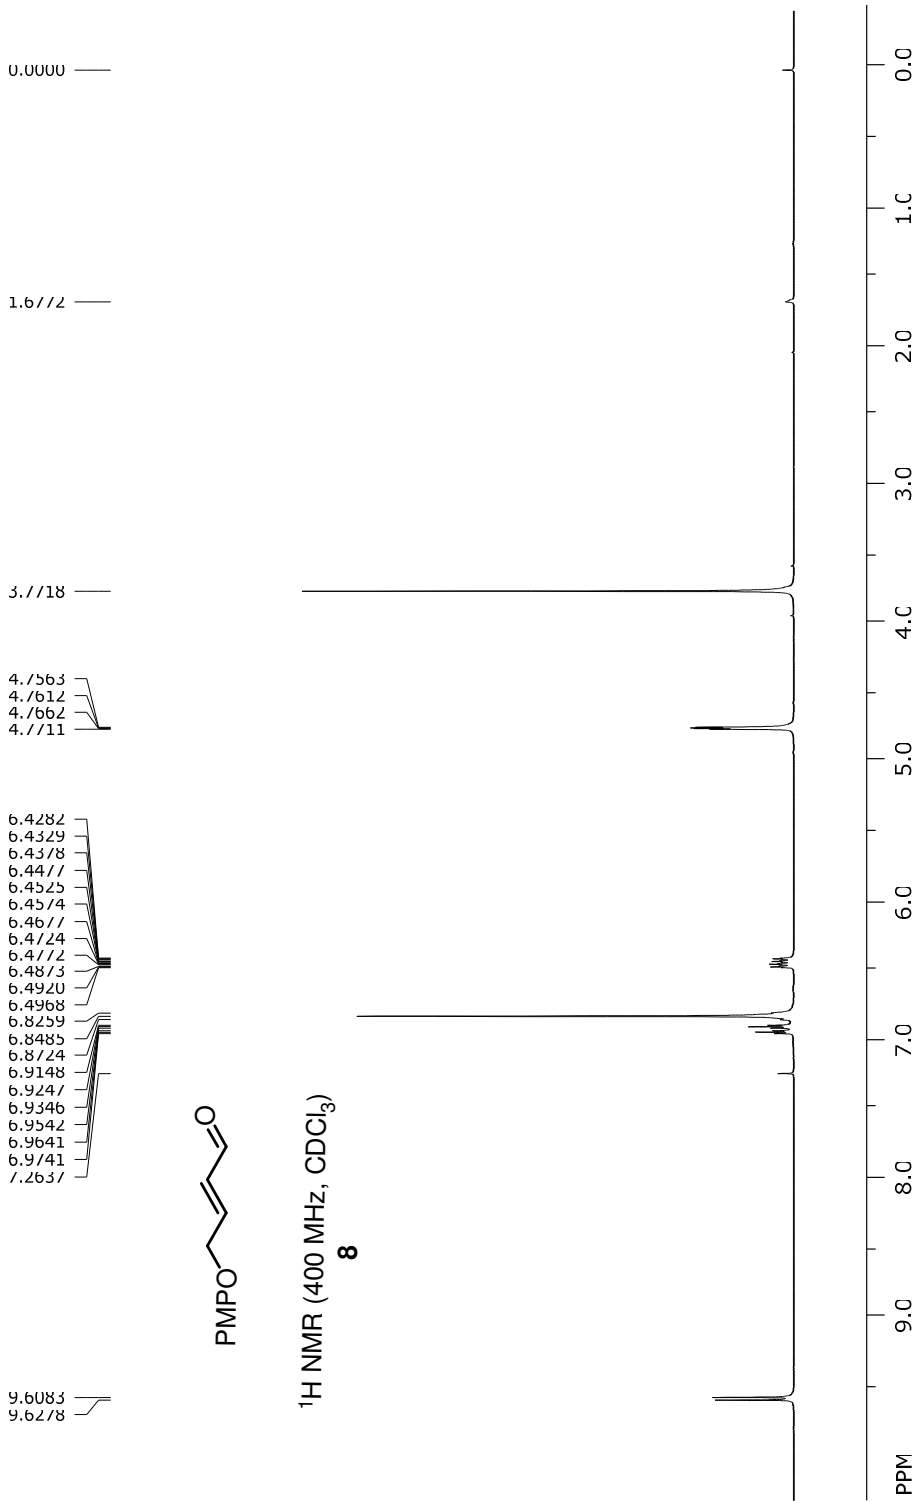

file: ... \NMR-400(new)-LZ\zh081123s2\10\frd exp: <zg30>  
 transmitter freq.: 400.132471 MHz  
 time domain size: 65536 points  
 width: 8278.15 Hz = 20.6885 ppm = 0.126314 Hz/pt  
 number of scans: 16  
 freq. of 0 ppm: 400.130008 MHz  
 processed size: 32768 complex points  
 LB: 0.300 GF: 0.0000  
 Hz/cm: 172.589 ppm/cm: 0.43133



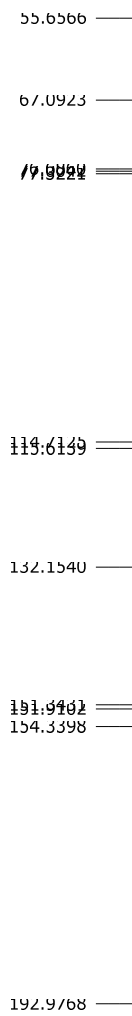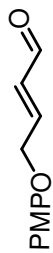

<sup>13</sup>C NMR (100 MHz, CDCl<sub>3</sub>)  
**8**

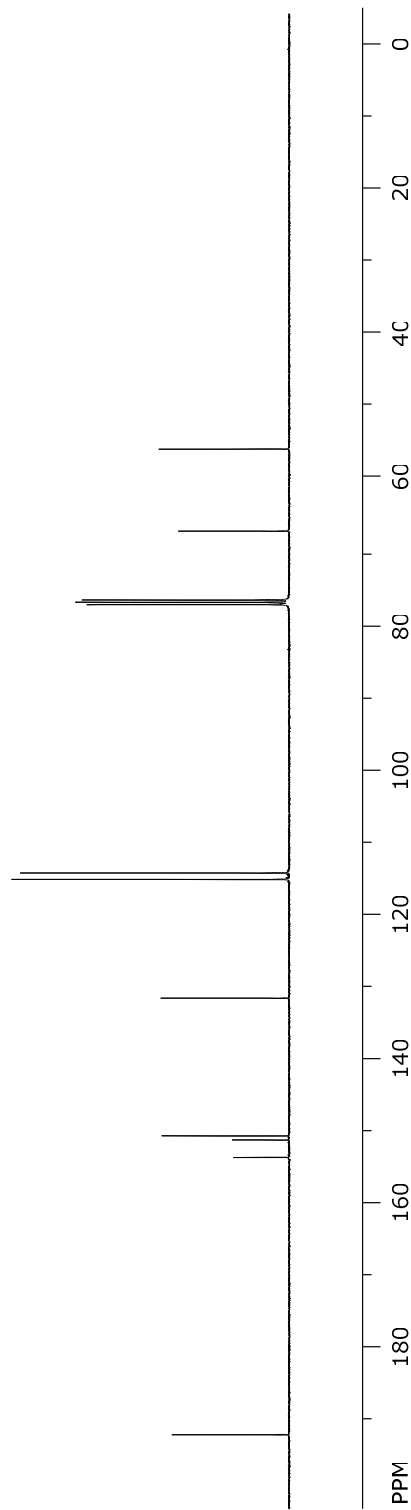

file: ... \NMR-400(new)-LZ\zh081123s2\11\fid exp: <zpgg30>  
 transmitter freq.: 100.622830 MHz  
 time domain size: 65536 points  
 width: 23980.82 Hz = 238.3238 ppm = 0.365918 Hz/pt  
 number of scans: 4096

freq. of 0 ppm: 100.612775 MHz  
 processed size: 32768 complex points  
 LB: 1.000 GF: 0.0000  
 Hz/cm: 838.154 ppm/cm: 8.32966

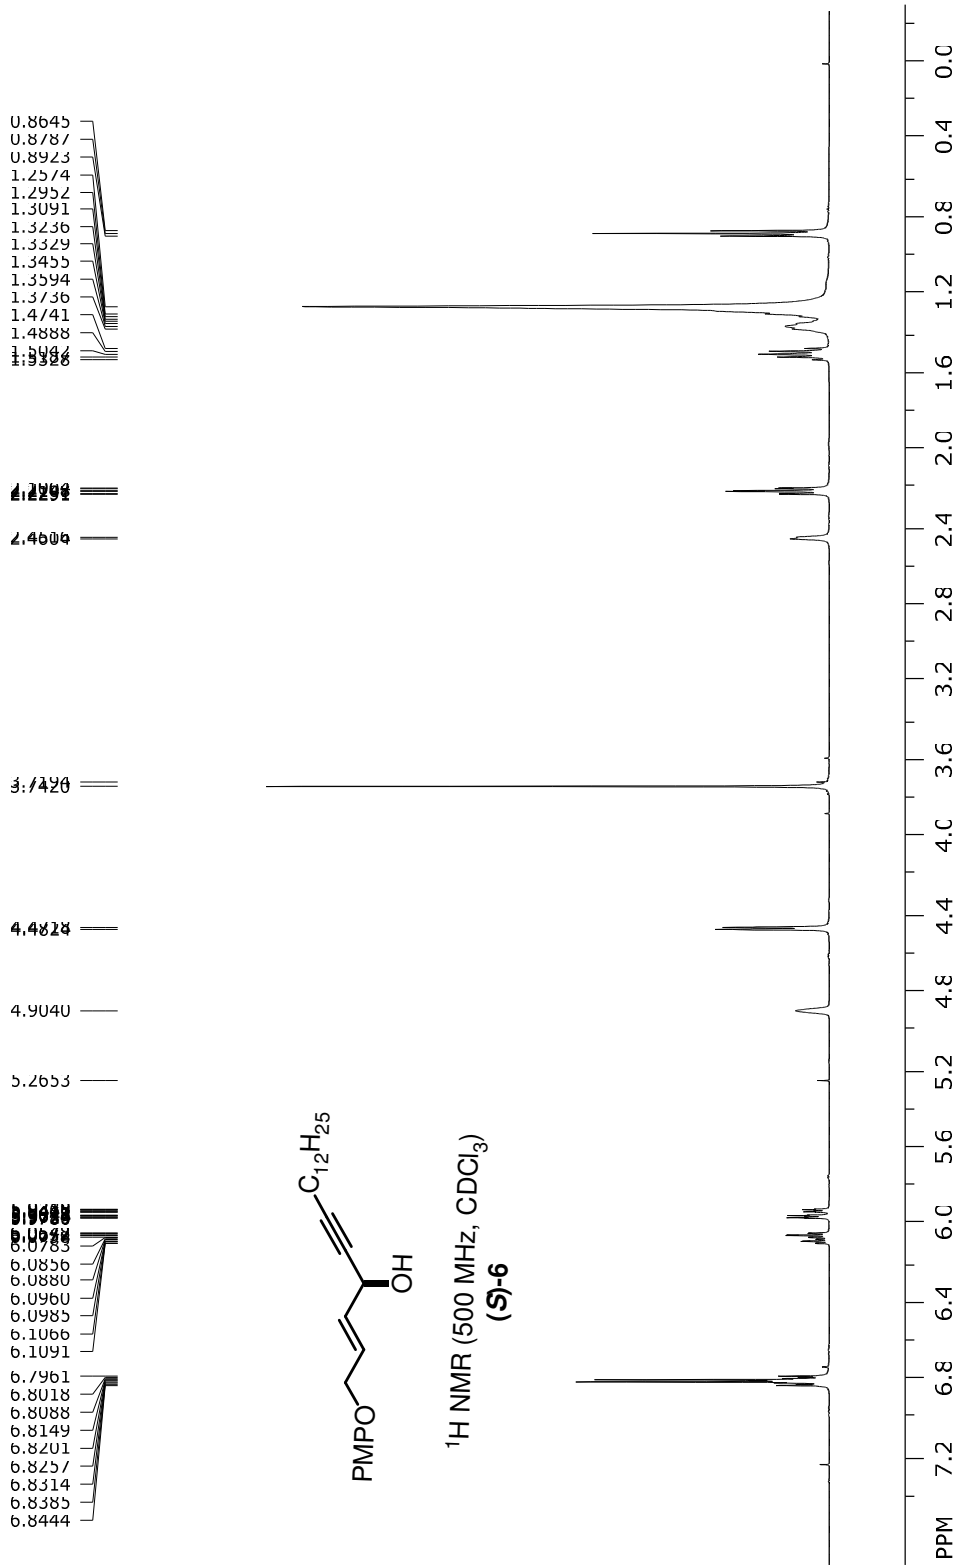

file: D:\NMR-500-LZ\zh090103s2\1\fid exp: <zg30>  
 transmitter freq.: 500.133089 MHz  
 time domain size: 65536 points  
 width: 10330.58 Hz = 20.6557 ppm = 0.157632 Hz/pt  
 number of scans: 16

freq. of 0 ppm: 500.130016 MHz  
 processed size: 32768 complex points  
 LB: 0.300 GF: 0.0000  
 Hz/cm: 160.973 ppm/cm: 0.32186

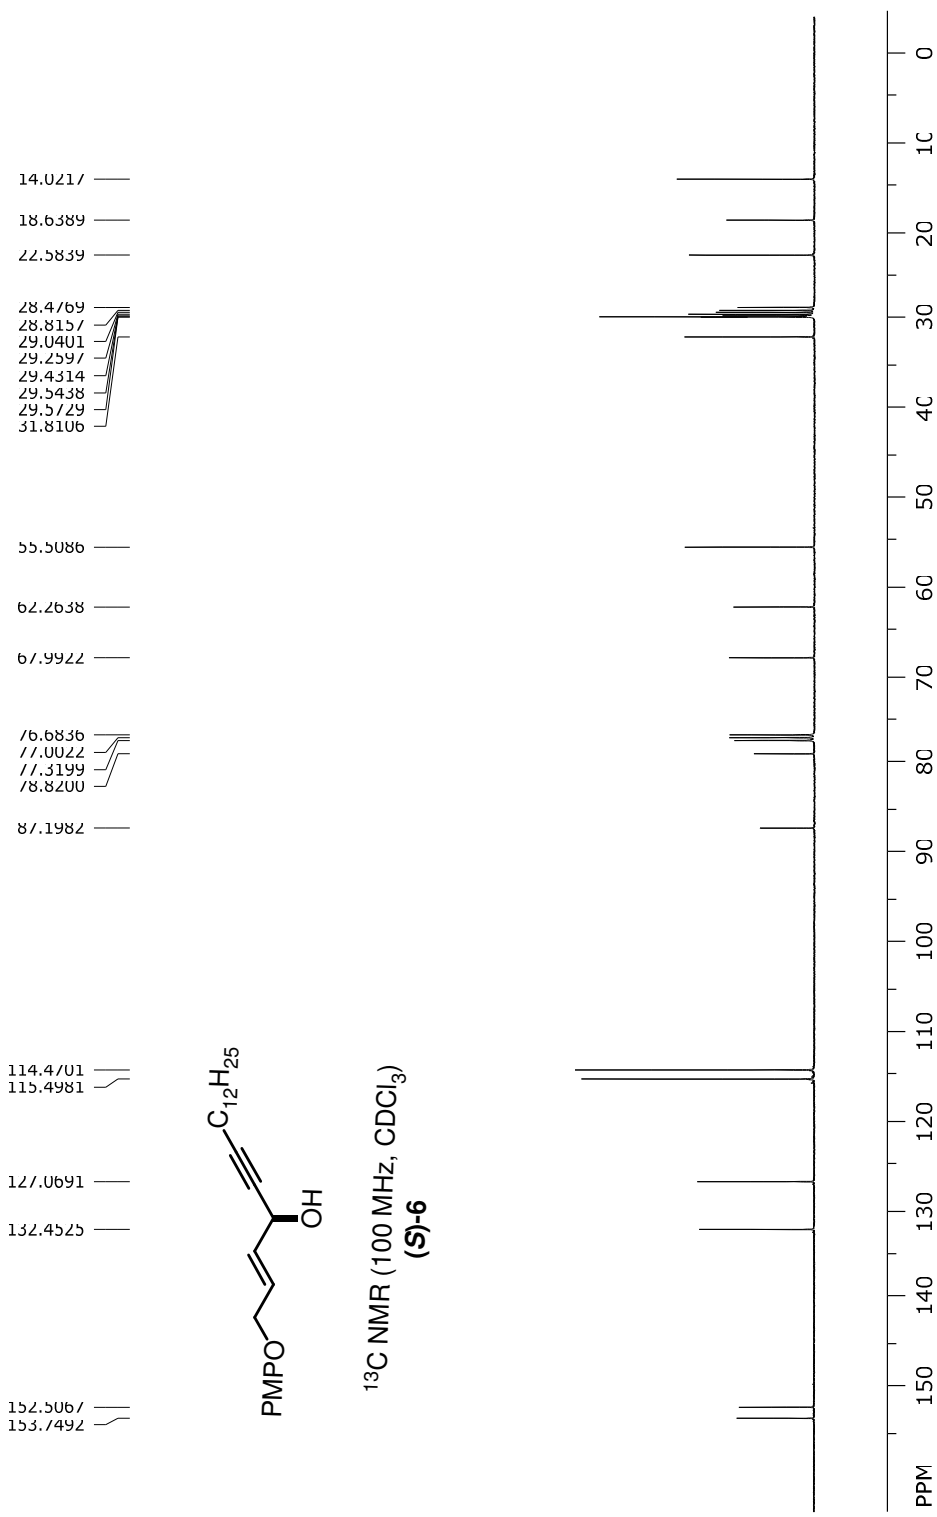

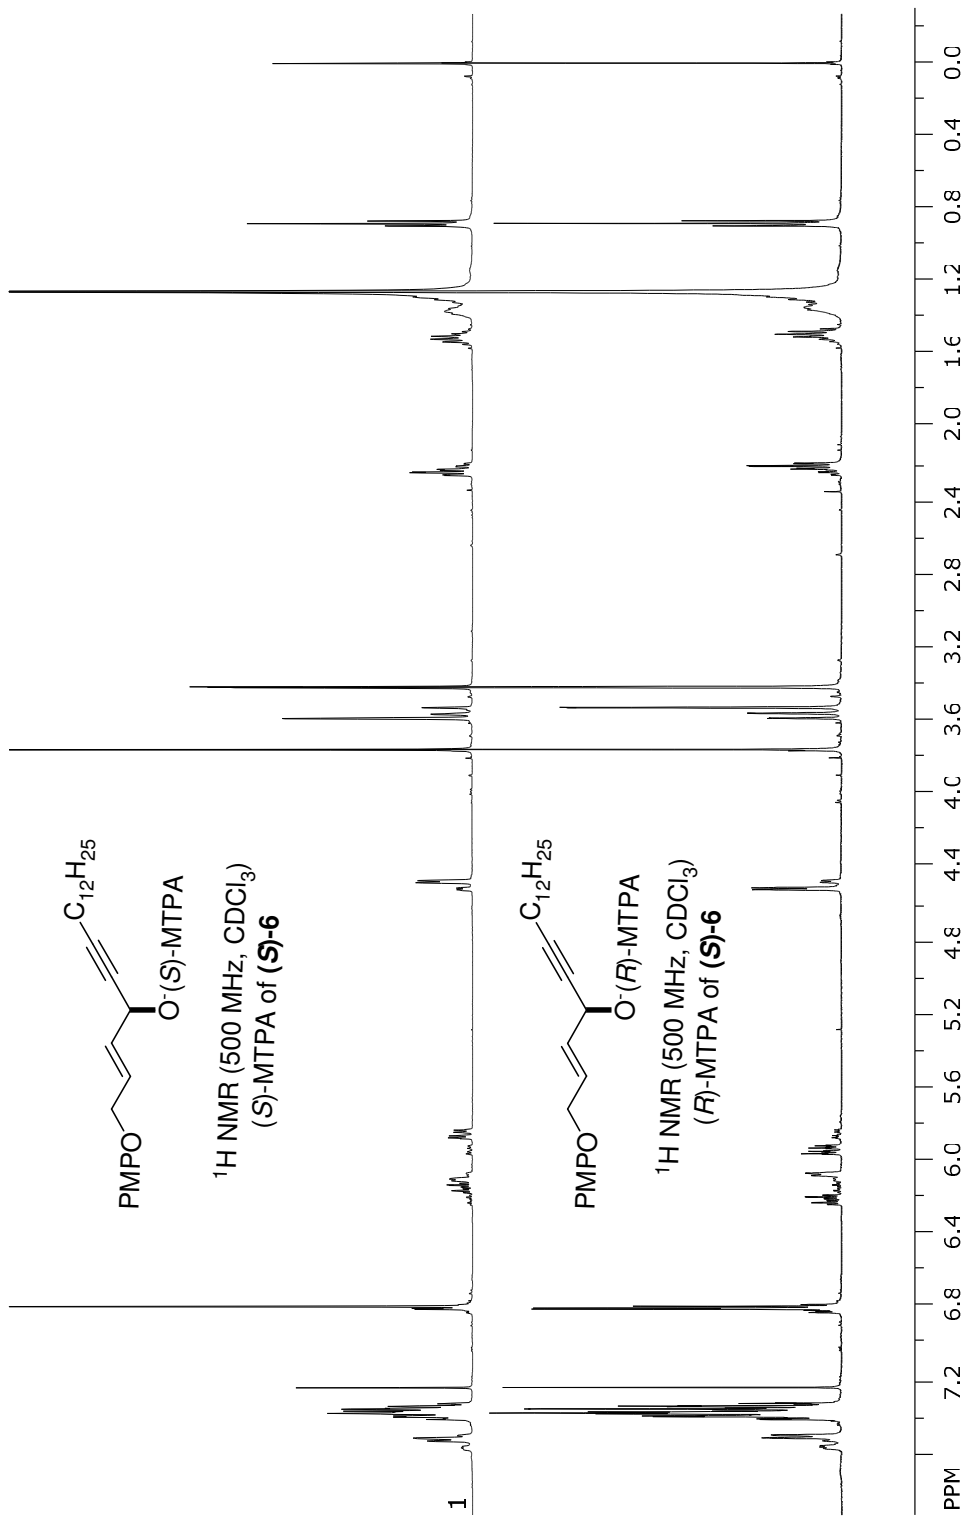

file: E:\NMR\NMR500LZ\h090209s8-S\1\fid exp: <zg30>  
 transmitter freq.: 500.133089 MHz  
 time domain size: 65536 points  
 width: 10330.58 Hz = 20.6557 ppm = 0.157632 Hz/pt  
 number of scans: 16

freq. of 0 ppm: 500.130014 MHz  
 processed size: 32768 complex points  
 LB: 0.300 GF: 0.0000  
 Hz/cm: 164.570 ppm/cm: 0.32905

*MTPA ester chemical shifts for determination of ee and absolute configuration:*

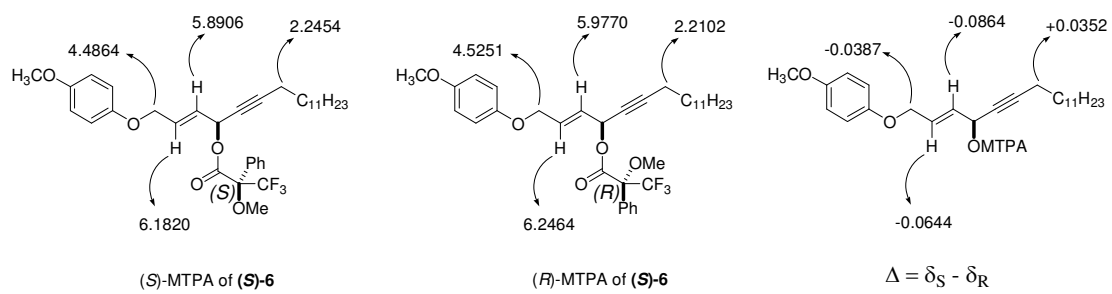

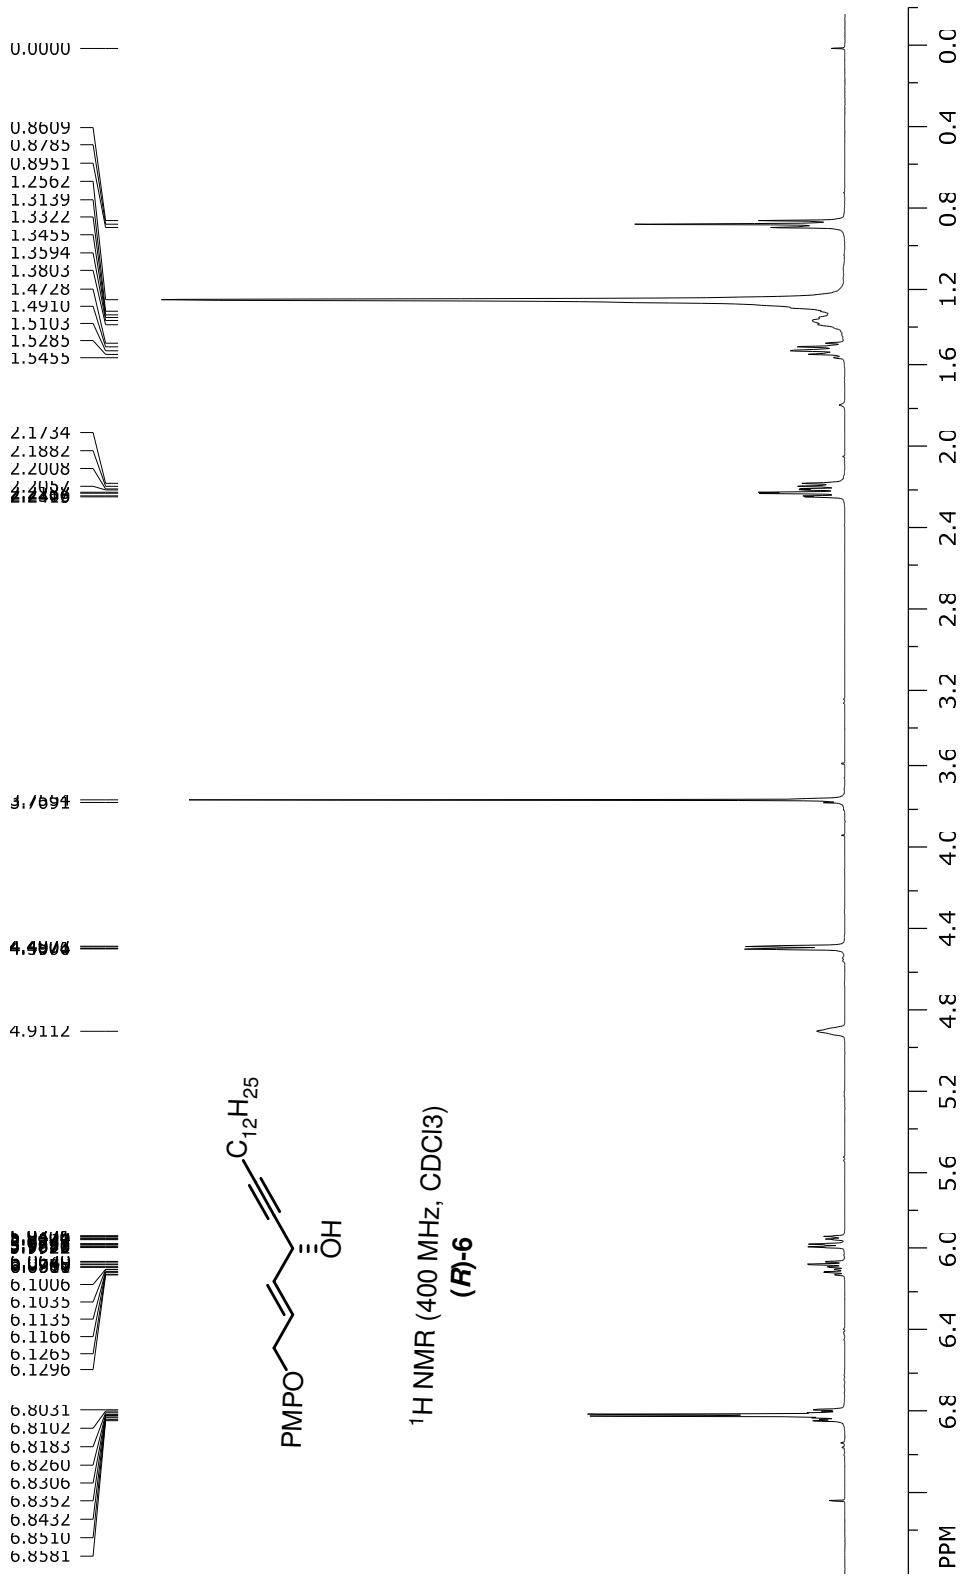

file: ...iu\NMR 400Hz new\zh081207s2\10\fid expt: <zg30>  
 transmitter freq.: 400.132471 MHz  
 time domain size: 65536 points  
 width: 8278.15 Hz = 20.6885 ppm = 0.126314 Hz/pt  
 number of scans: 16

freq. of 0 ppm: 400.130010 MHz  
 processed size: 32768 complex points  
 LB: 0.300 GF: 0.0000  
 Hz/cm: 124.765 ppm/cm: 0.31181

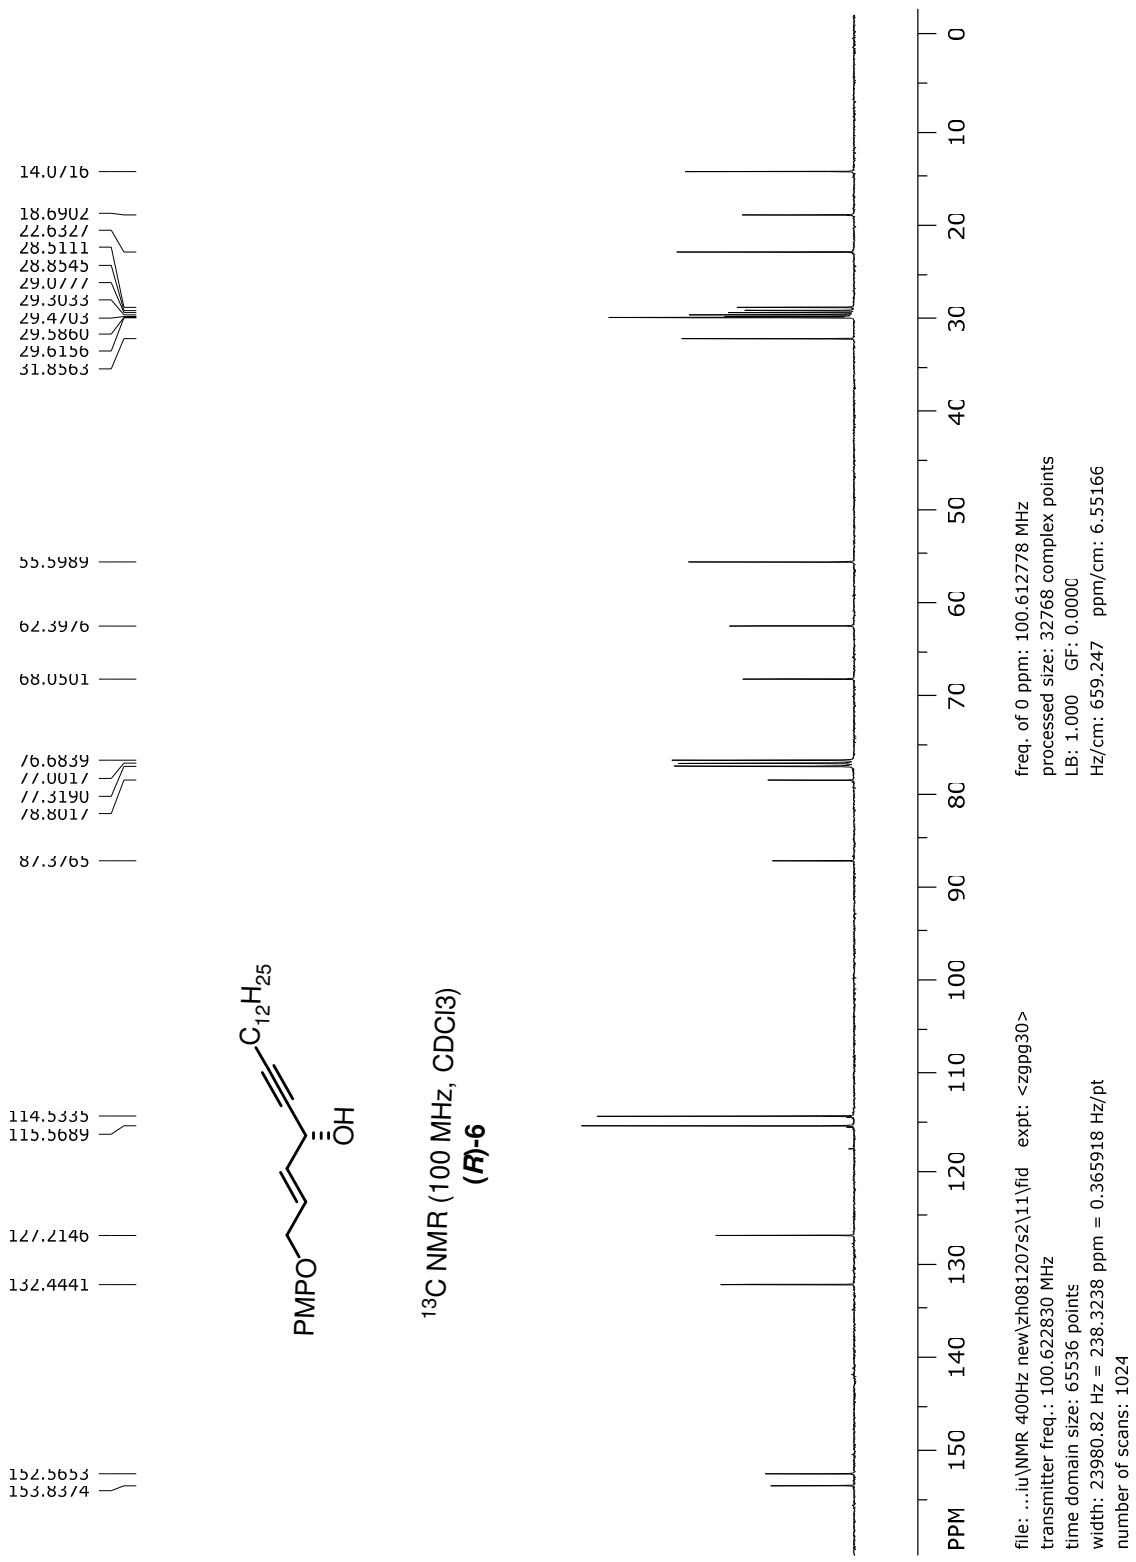

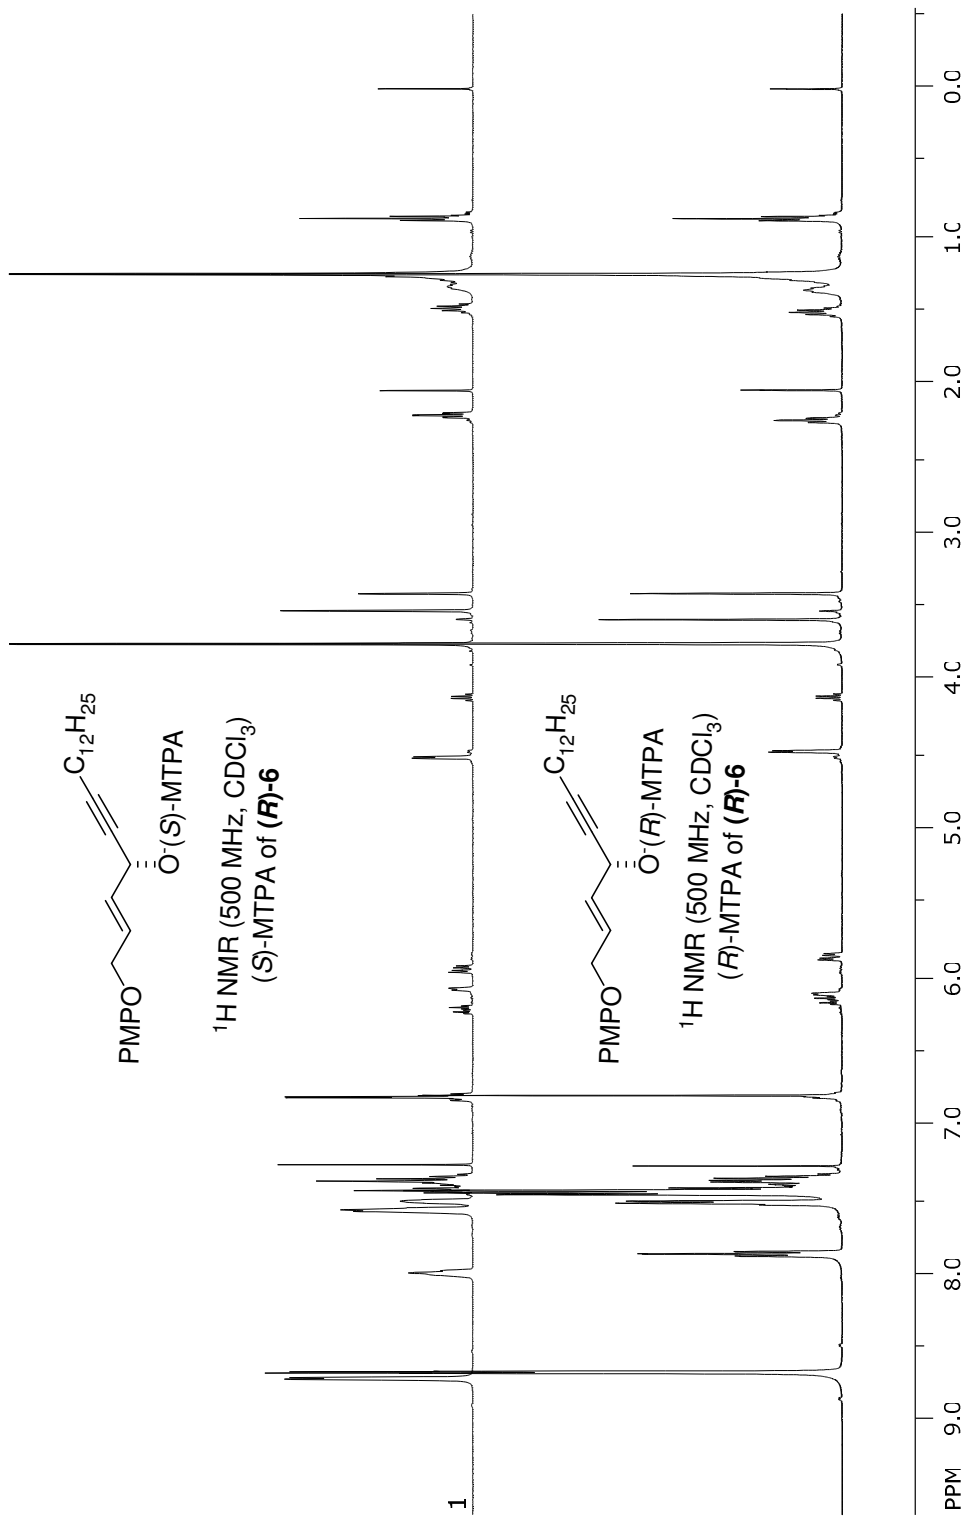

file: E:\NMR\NMR500LZ\h090102s8-S\1\fid exp: <zg30>  
 transmitter freq.: 500.133089 MHz  
 time domain size: 65536 points  
 width: 10330.58 Hz = 20.6557 ppm = 0.157632 Hz/pt  
 number of scans: 16

freq. of 0 ppm: 500.129998 MHz  
 processed size: 32768 complex points  
 LB: 0.300 GF: 0.0000  
 Hz/cm: 203.239 ppm/cm: 0.40637



*MTPA ester chemical shifts for determination of ee and absolute configuration:*

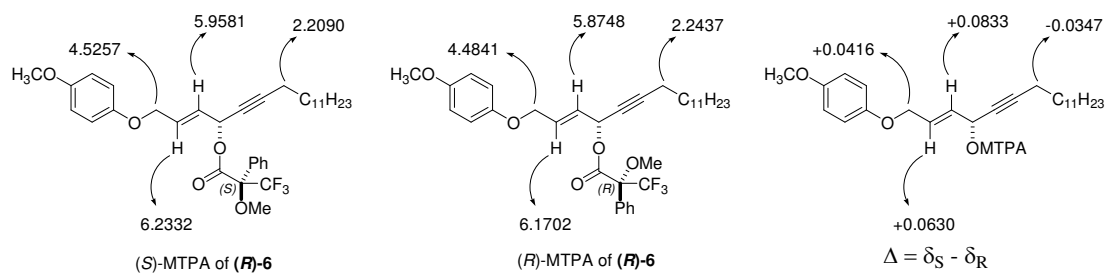

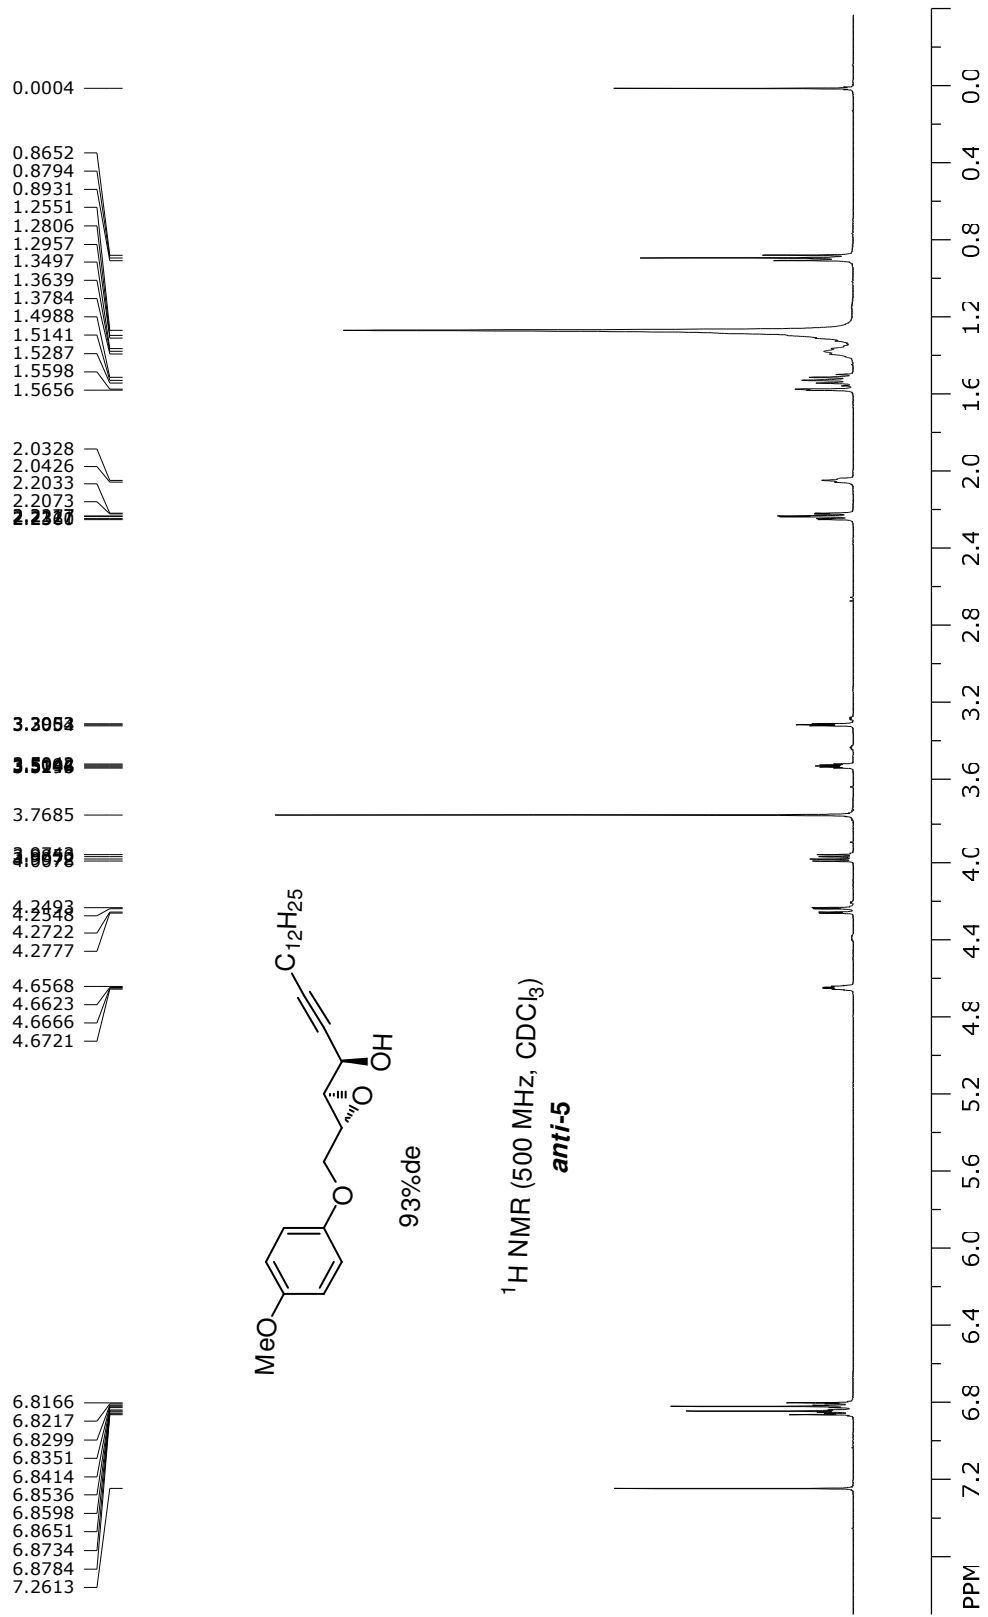

file: D:\NMR-500-LZ\zn090301s5\1\fid exp: <zg30>  
 transmitter freq.: 500.133089 MHz  
 time domain size: 65536 points  
 width: 10330.58 Hz = 20.6557 ppm = 0.157632 Hz/pt  
 number of scans: 16

freq. of 0 ppm: 500.130013 MHz  
 processed size: 32768 complex points  
 LB: 0.300 GF: 0.0000  
 Hz/cm: 165.919 ppm/cm: 0.33175

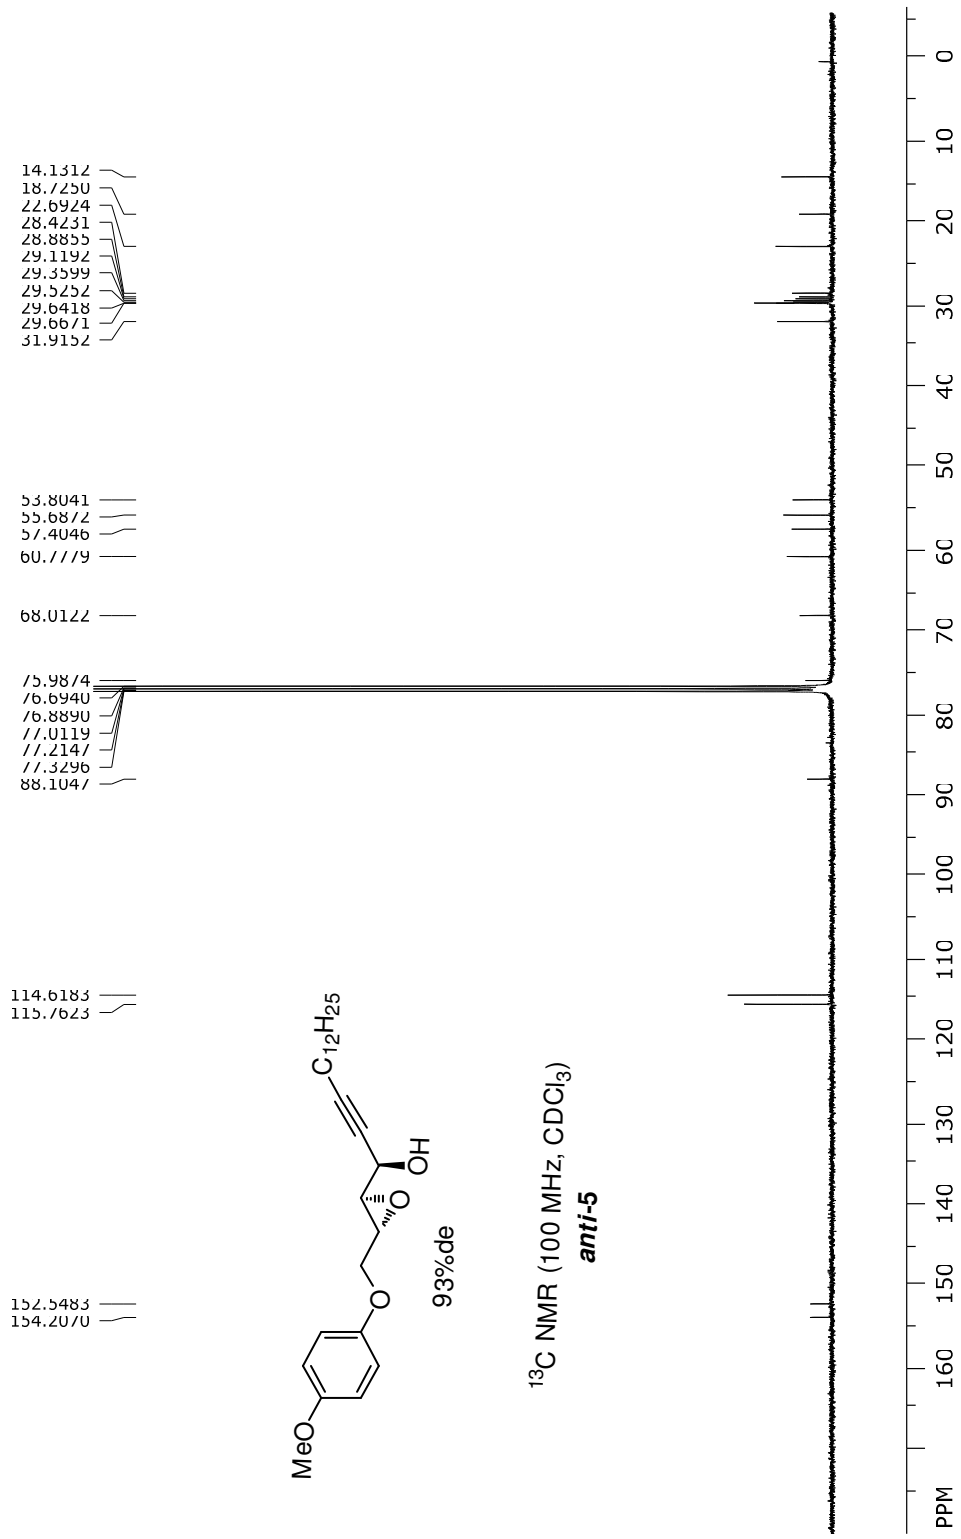

file: ... \NMR-400(new)-LZ\zh09030155\15\fid exp: <zpgg30>  
 transmitter freq.: 100.622830 MHz  
 time domain size: 65536 points  
 width: 23980.82 Hz = 238.3238 ppm = 0.365918 Hz/pt  
 number of scans: 4096

freq. of 0 ppm: 100.612771 MHz  
 processed size: 32768 complex points  
 LB: 1.000 GF: 0.0000  
 Hz/cm: 751.521 ppm/cm: 7.46869

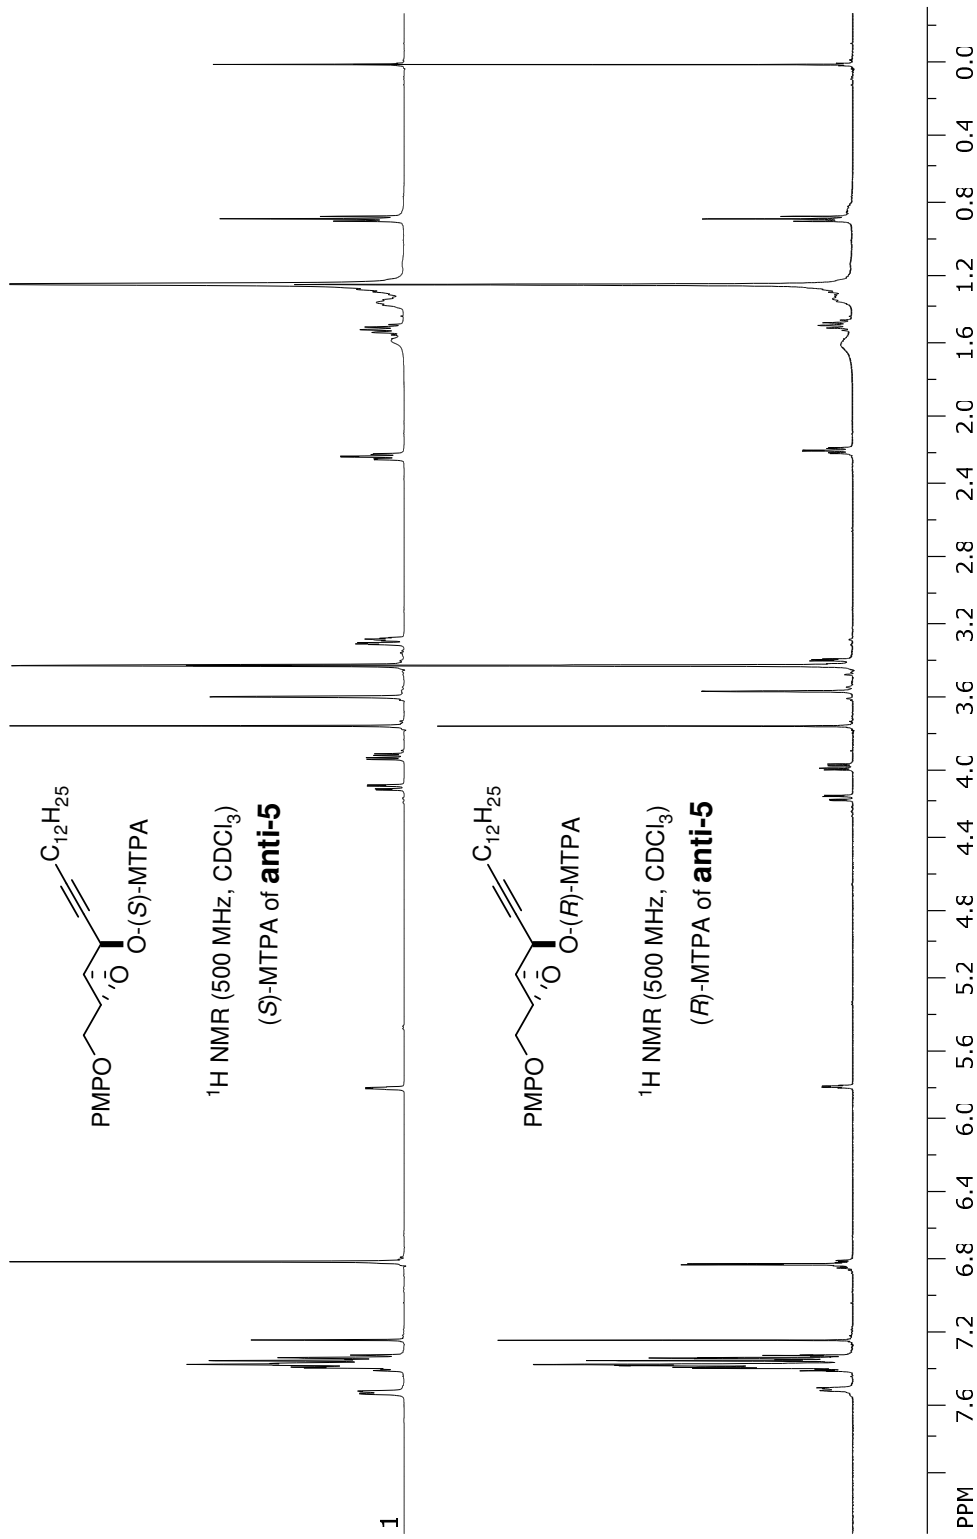

file: ... \NMR\NMR500L\zh090702s2-SCI\2\fid exp: <zg30>  
 transmitter freq.: 500.133089 MHz  
 time domain size: 65536 points  
 width: 10330.58 Hz = 20.6557 ppm = 0.157632 Hz/pt  
 number of scans: 16

freq. of 0 ppm: 500.130014 MHz  
 processed size: 32768 complex points  
 LB: 0.300 GF: 0.0000  
 Hz/cm: 173.113 ppm/cm: 0.34613

*MTPA ester chemical shifts for determination of ee and absolute configuration:*

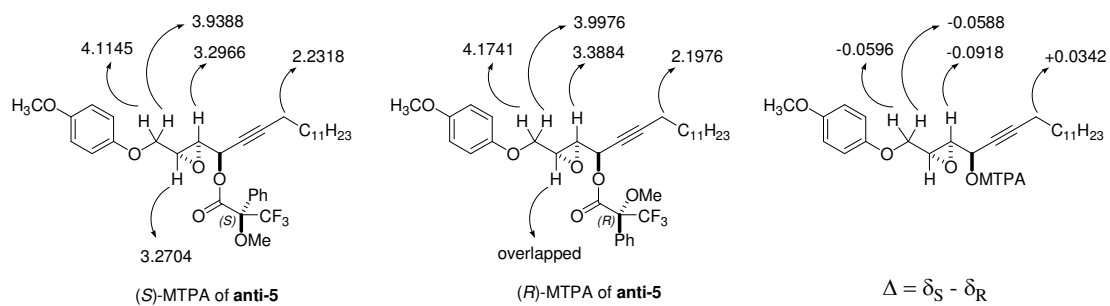

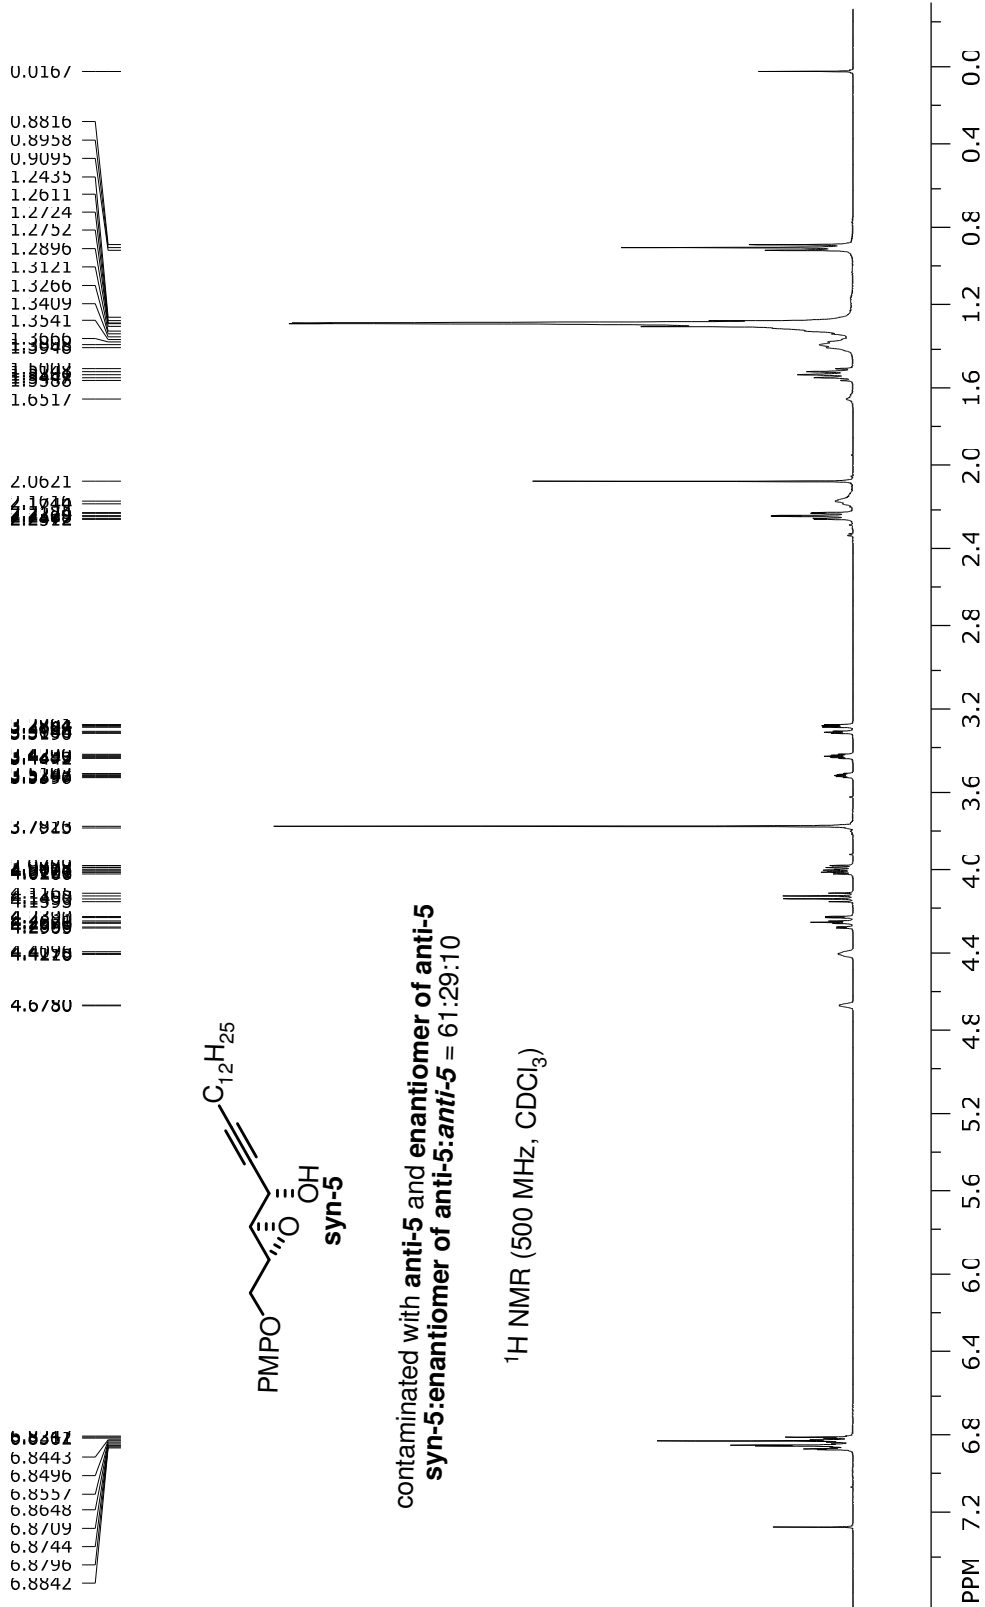

file: D:\NMR-500-LZ\zn090105s2\1\fid exp: <zg30>  
 transmitter freq.: 500.133089 MHz  
 time domain size: 65536 points  
 width: 10330.58 Hz = 20.6557 ppm = 0.157632 Hz/pt  
 number of scans: 16

freq. of 0 ppm: 500.130004 MHz  
 processed size: 32768 complex points  
 LB: 0.300 GF: 0.0000  
 HZ/cm: 159.624 ppm/cm: 0.31916

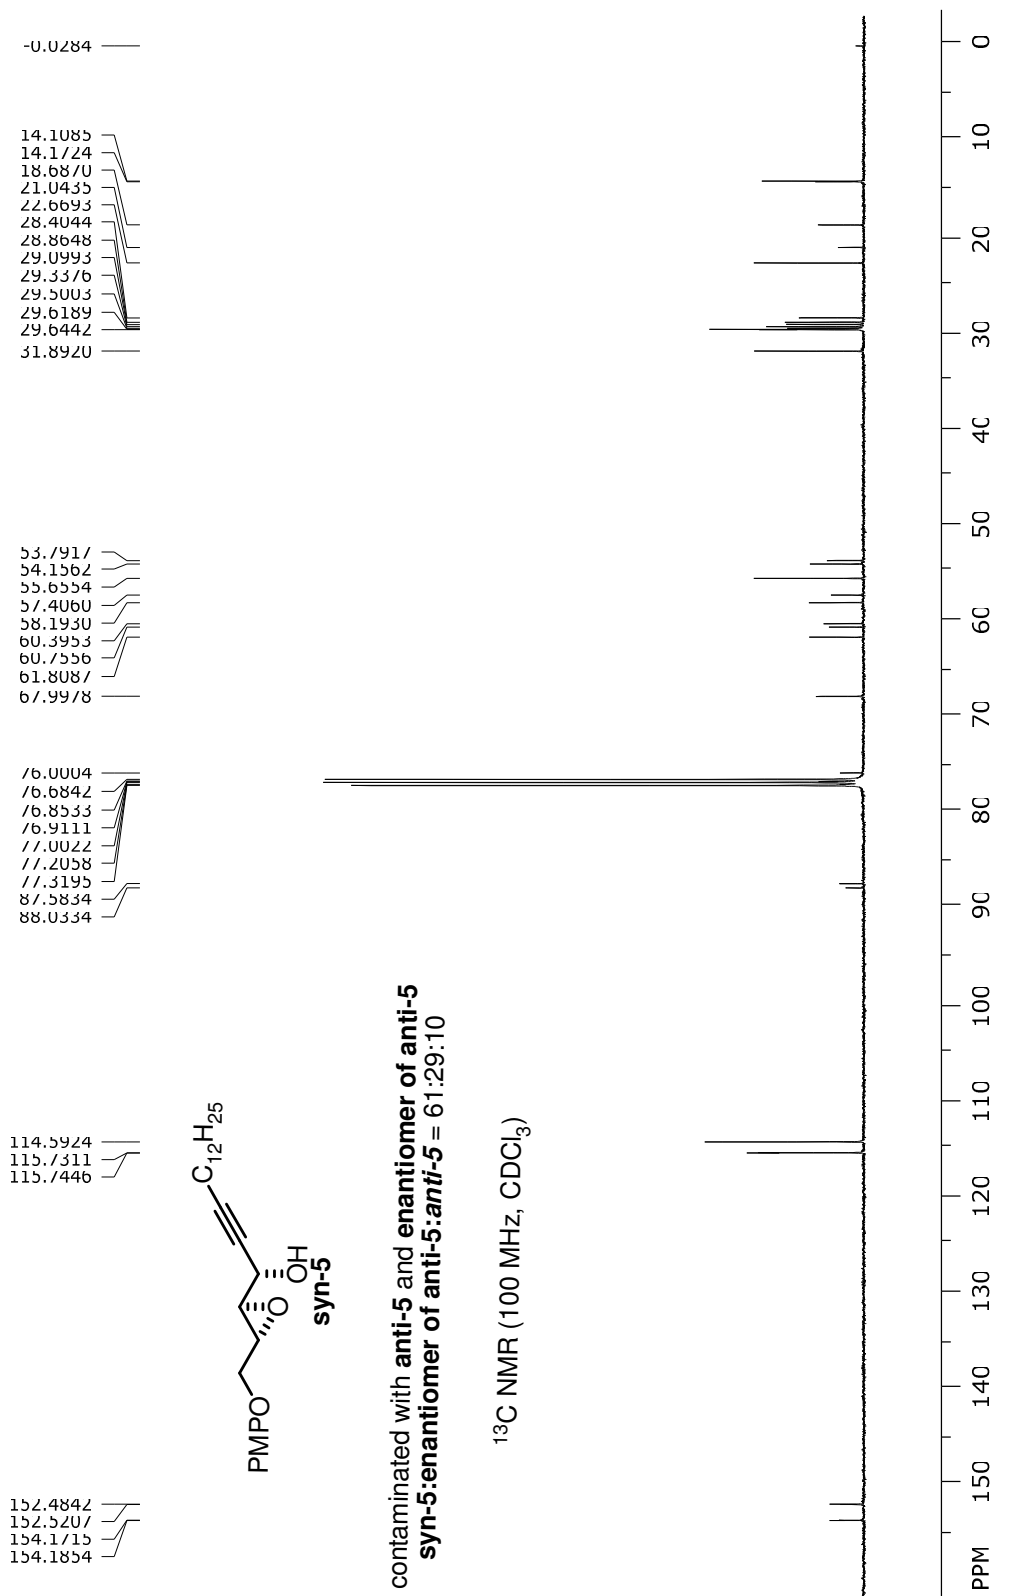

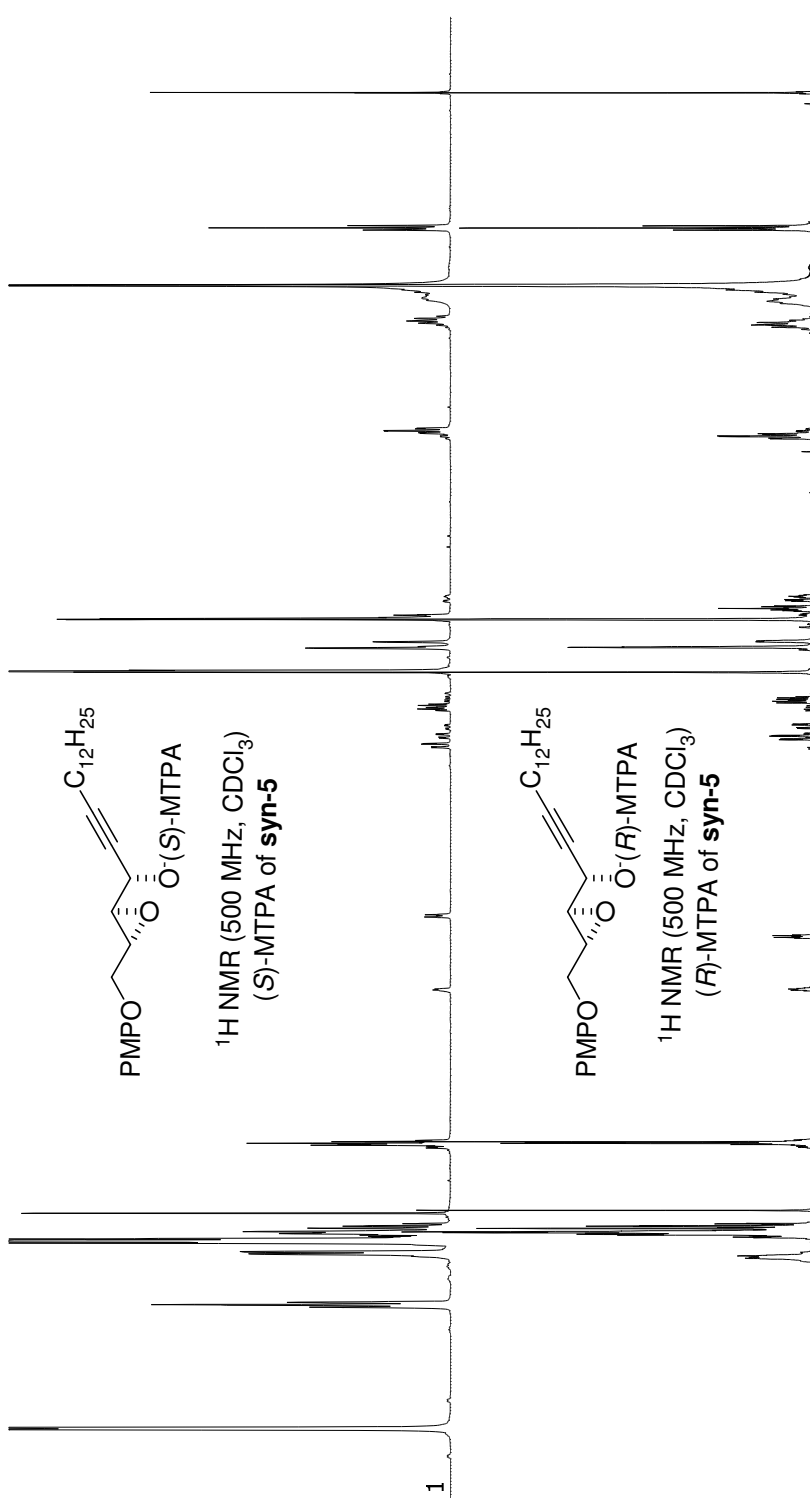

file: E:\NMR\NMR500LZ\zh090209s2-S\1\fid exp: <zg30>  
 transmitter freq.: 500.133089 MHz  
 time domain size: 65536 points  
 width: 10330.58 Hz = 20.6557 ppm = 0.157632 Hz/pt  
 number of scans: 16

freq. of 0 ppm: 500.130014 MHz  
 processed size: 32768 complex points  
 LB: 0.300 GF: 0.0000  
 Hz/cm: 192.448 ppm/cm: 0.38479



*MTPA ester chemical shifts for determination of ee and absolute configuration:*

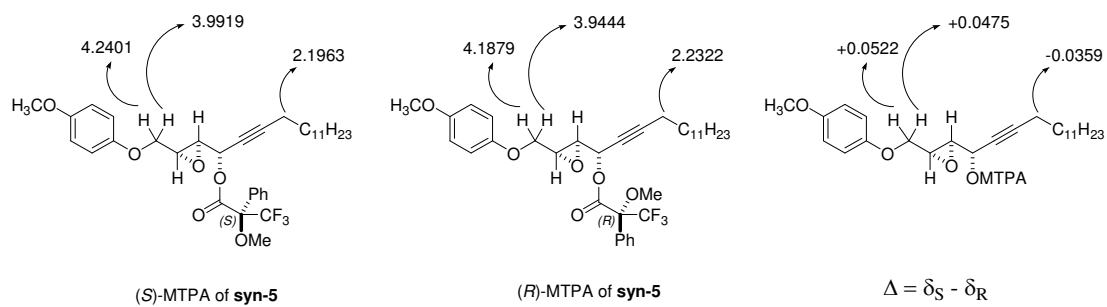

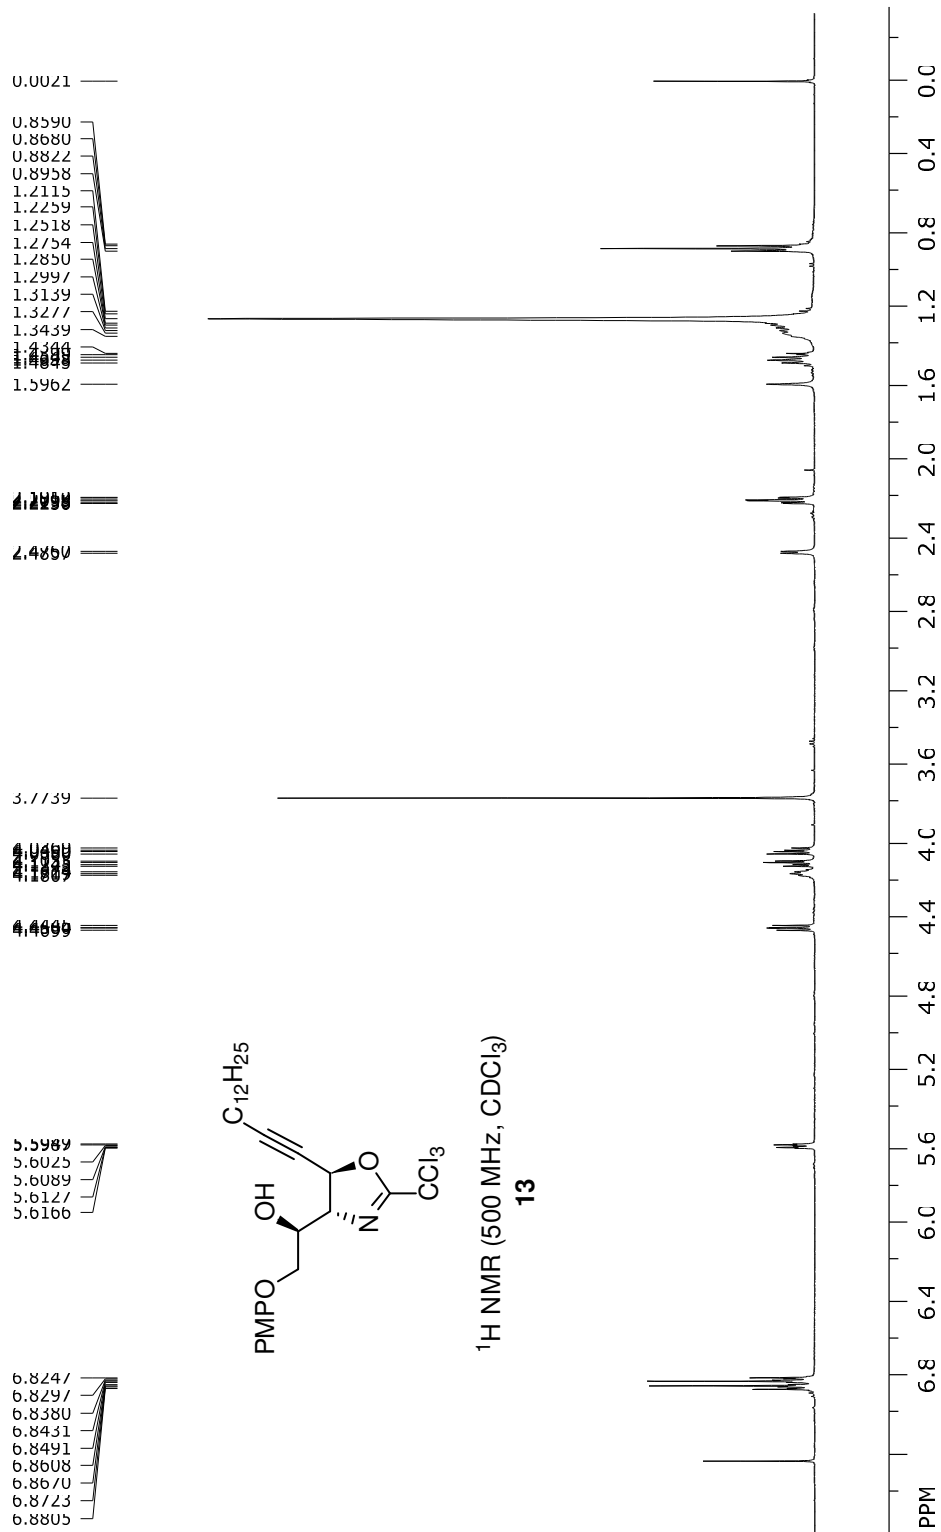

file: E:\NMR\NMR500LZ\zh090624s3\1\fid exp: <zg30>  
 transmitter freq.: 500.133089 MHz  
 time domain size: 65536 points  
 width: 10330.58 Hz = 20.6557 ppm = 0.157632 Hz/pt  
 number of scans: 16

freq. of 0 ppm: 500.130013 MHz  
 processed size: 32768 complex points  
 LB: 0.300 GF: 0.0000  
 Hz/cm: 160.073 ppm/cm: 0.32006

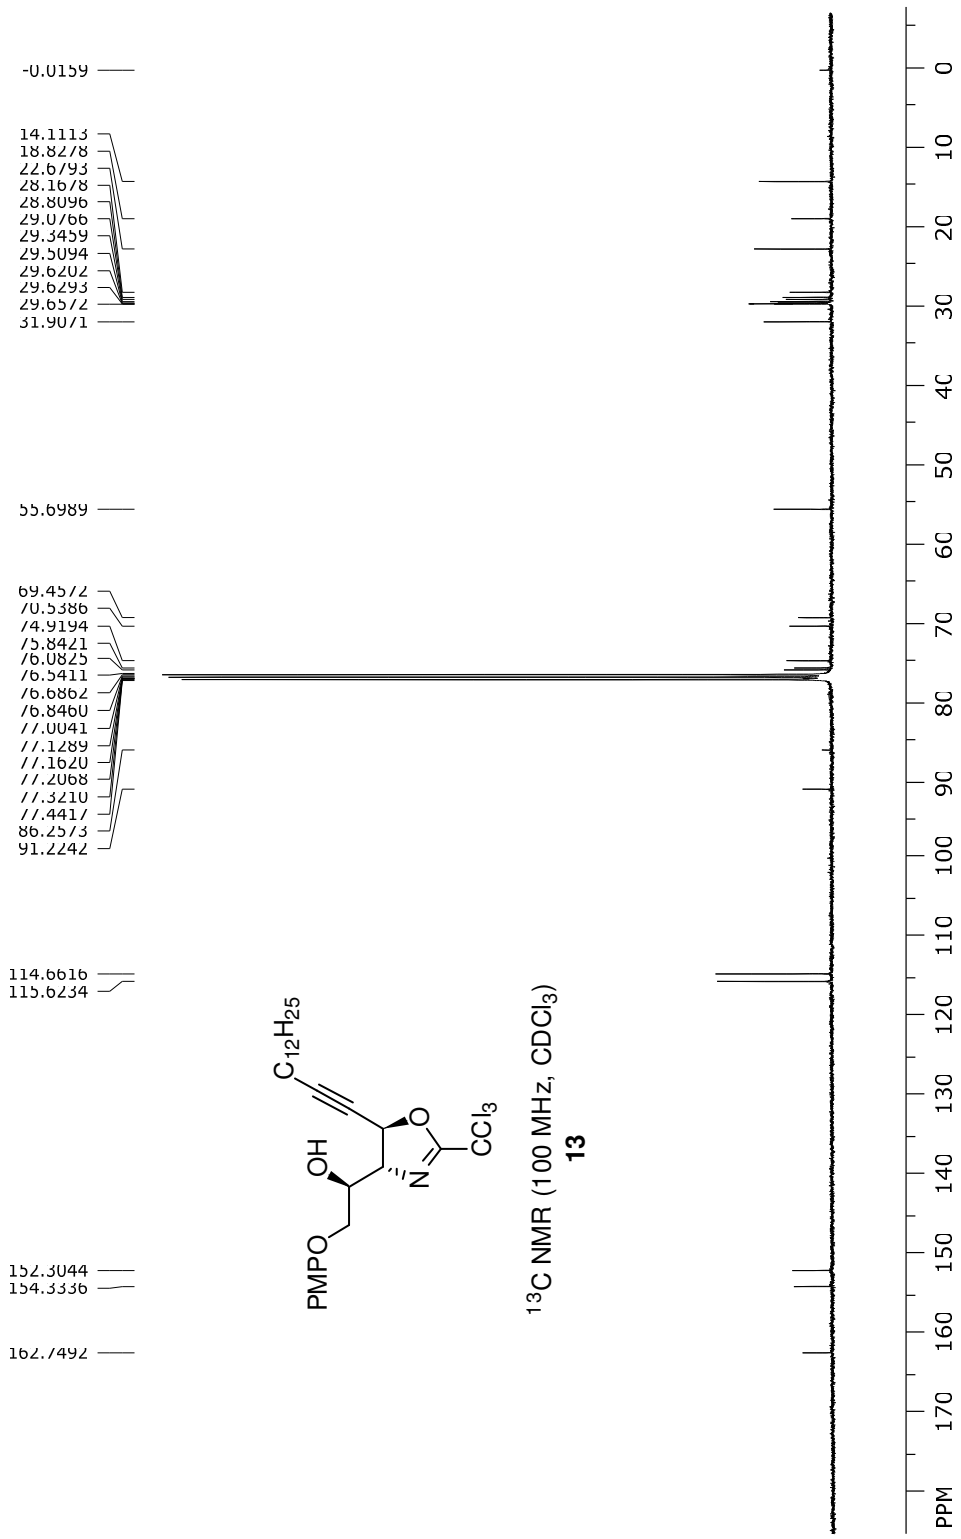

file: E:\NMR\NMR400L\zh090624s3\12\fid exp: <zgpg30>  
 transmitter freq.: 100.622830 MHz  
 time domain size: 65536 points  
 width: 23980.82 Hz = 238.3238 ppm = 0.365918 Hz/pt  
 number of scans: 4096  
 freq. of 0 ppm: 100.612771 MHz  
 processed size: 32768 complex points  
 LB: 1.000 GF: 0.0000  
 Hz/cm: 776.571 ppm/cm: 7.71765

SpinWorks 3: COSY45SW CDCI3 /opt/topspin1.3 guest 5

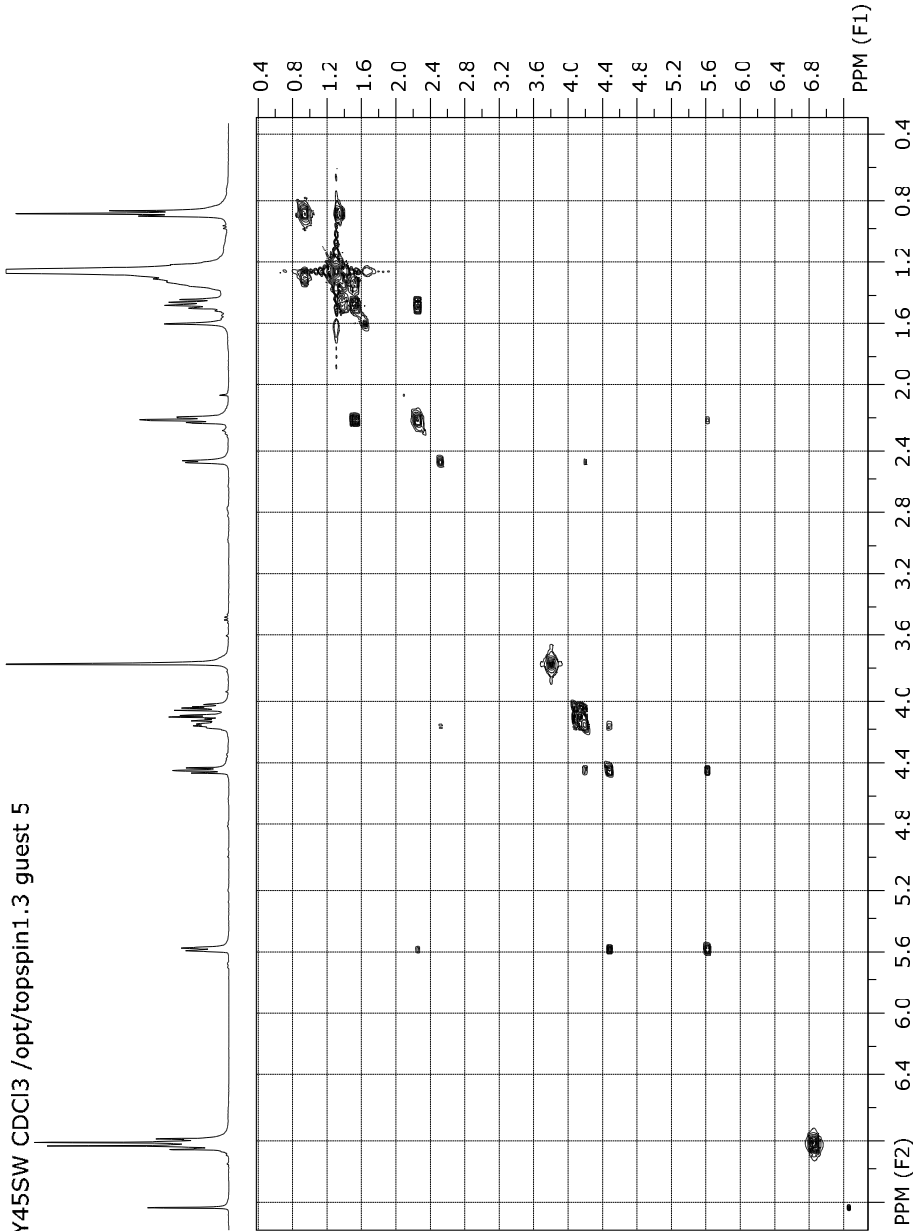

file: I:\NMR\NMR400LZ\zh090624s3\11\ser  
 expt: <cosyqf45>  
 transmitter freq: 400.131595 MHz  
 time domain size: 2048 by 128 points  
 width (F2): 3109.45 Hz = 7.7711 ppm = 1.5183 Hz/pt  
 number of scans: 8

F2: freq. of 0 ppm: 400.1300101 MHz  
 processed size: 1024 complex points  
 window function: Sine  
 shift: 0.0 degrees  
 Hz/cm: 142.146 ppm/cm: 0.35525

F1: freq. of 0 ppm: 400.1300101 MHz  
 processed size: 1024 complex points  
 window function: Sine  
 shift: 0.0 degrees  
 Hz/cm: 258.448 ppm/cm: 0.64591

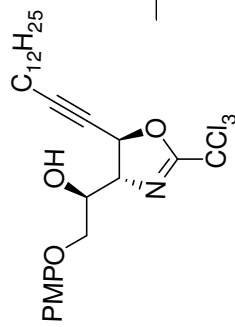

COSY (400 MHz, CDCl<sub>3</sub>)  
**13**

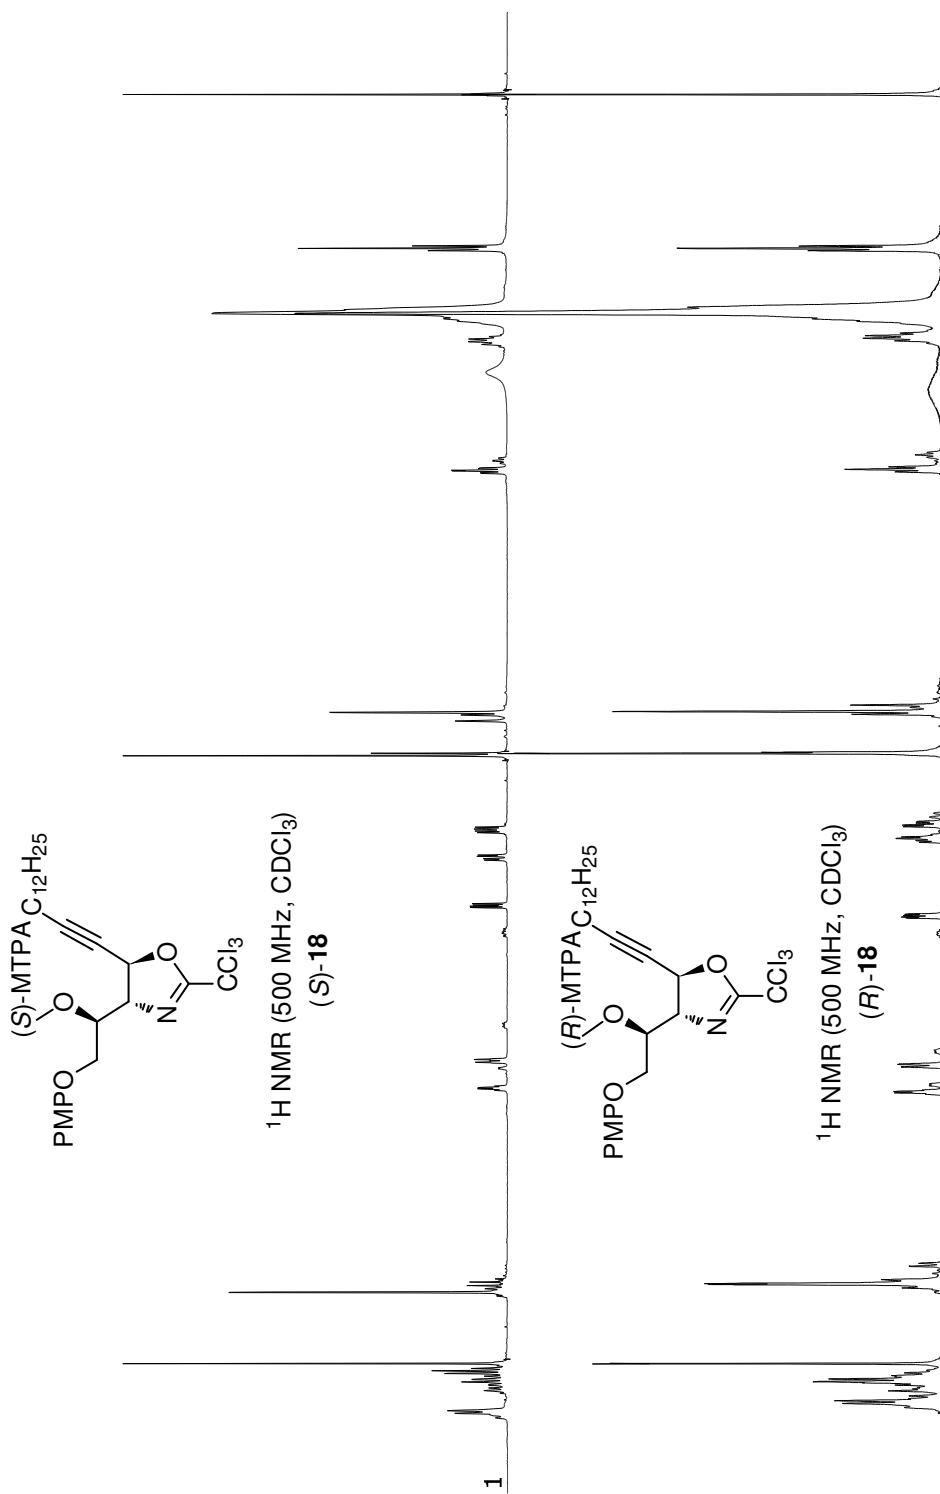

file: ... \NMR\NMR500LZ\zh090703s2-SCI\1.fid exp: <zg30>  
 transmitter freq.: 500.133089 MHz  
 time domain size: 65536 points  
 width: 10330.58 Hz = 20.6557 ppm = 0.157632 Hz/pt  
 number of scans: 16

freq. of 0 ppm: 500.130014 MHz  
 processed size: 32768 complex points  
 LB: 0.300 GF: 0.0000  
 Hz/cm: 169.516 ppm/cm: 0.33894

*MTPA ester chemical shifts for determination of ee and absolute configuration:*

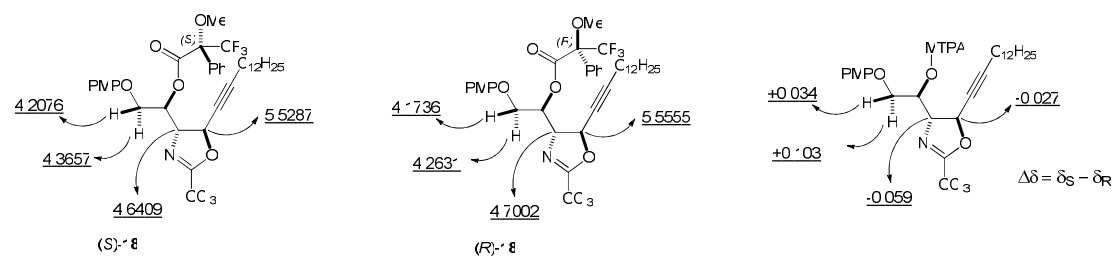

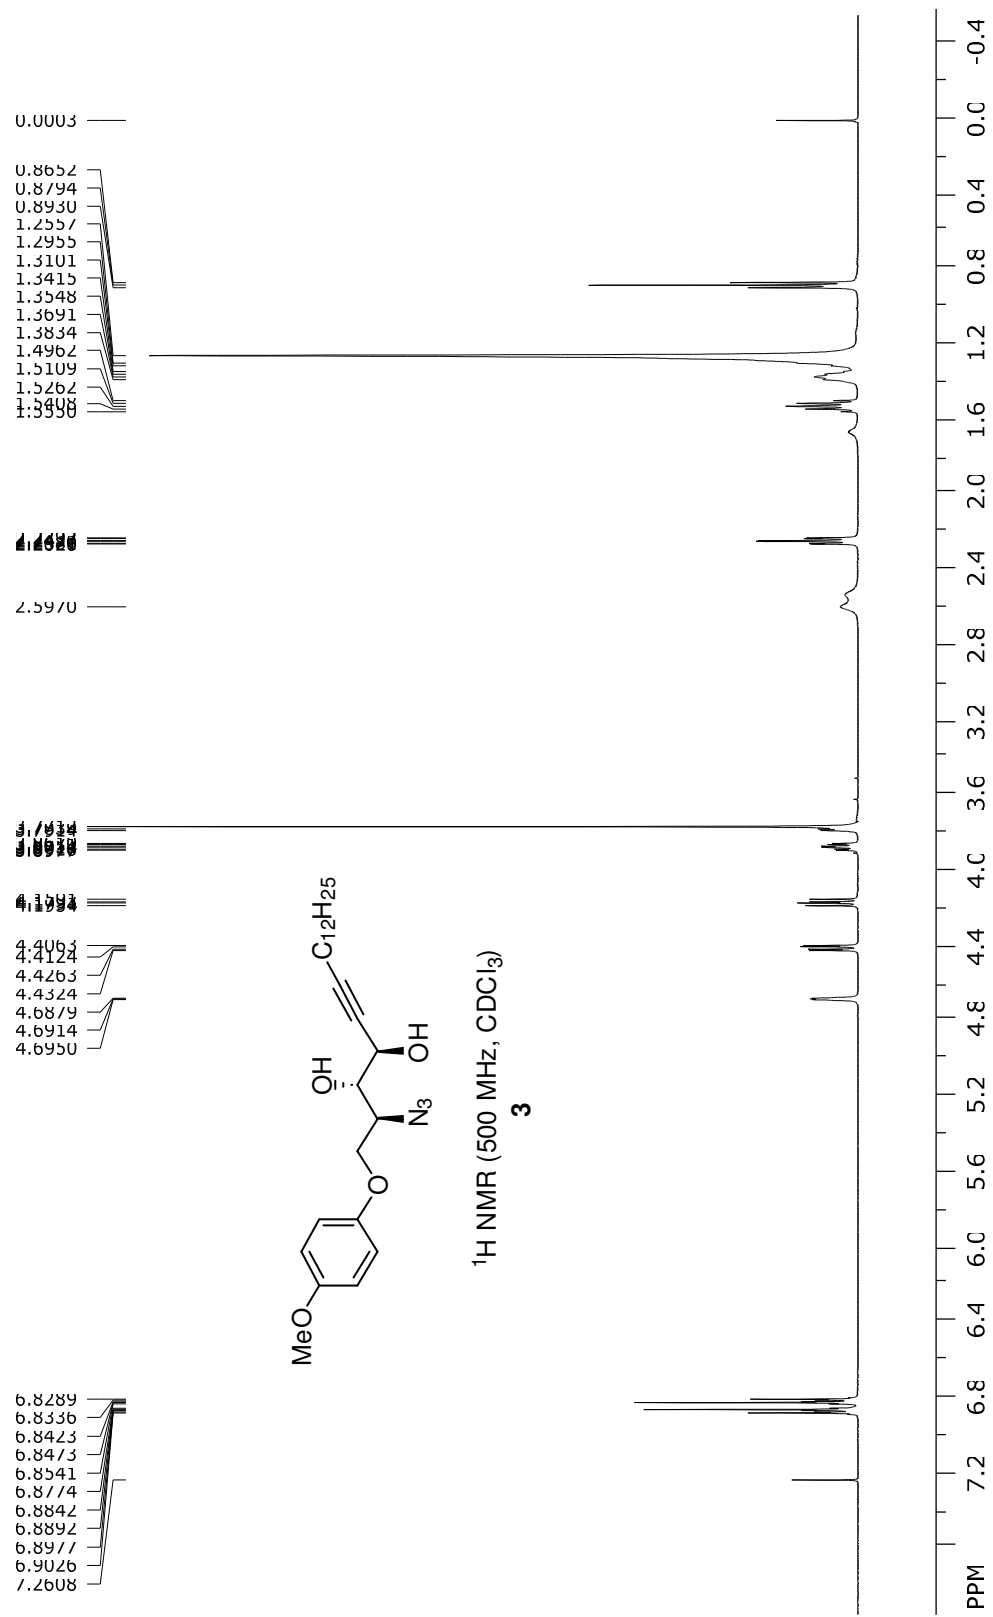

file: E:\NMR\NMR500L\zh090706s2\1\fid exp: <zg30>  
 transmitter freq.: 500.133089 MHz  
 time domain size: 65536 points  
 width: 10330.58 Hz = 20.6557 ppm = 0.157632 Hz/pt  
 number of scans: 16

freq. of 0 ppm: 500.130014 MHz  
 processed size: 32768 complex points  
 LB: 0.300 GF: 0.0000  
 Hz/cm: 170.865 ppm/cm: 0.34164

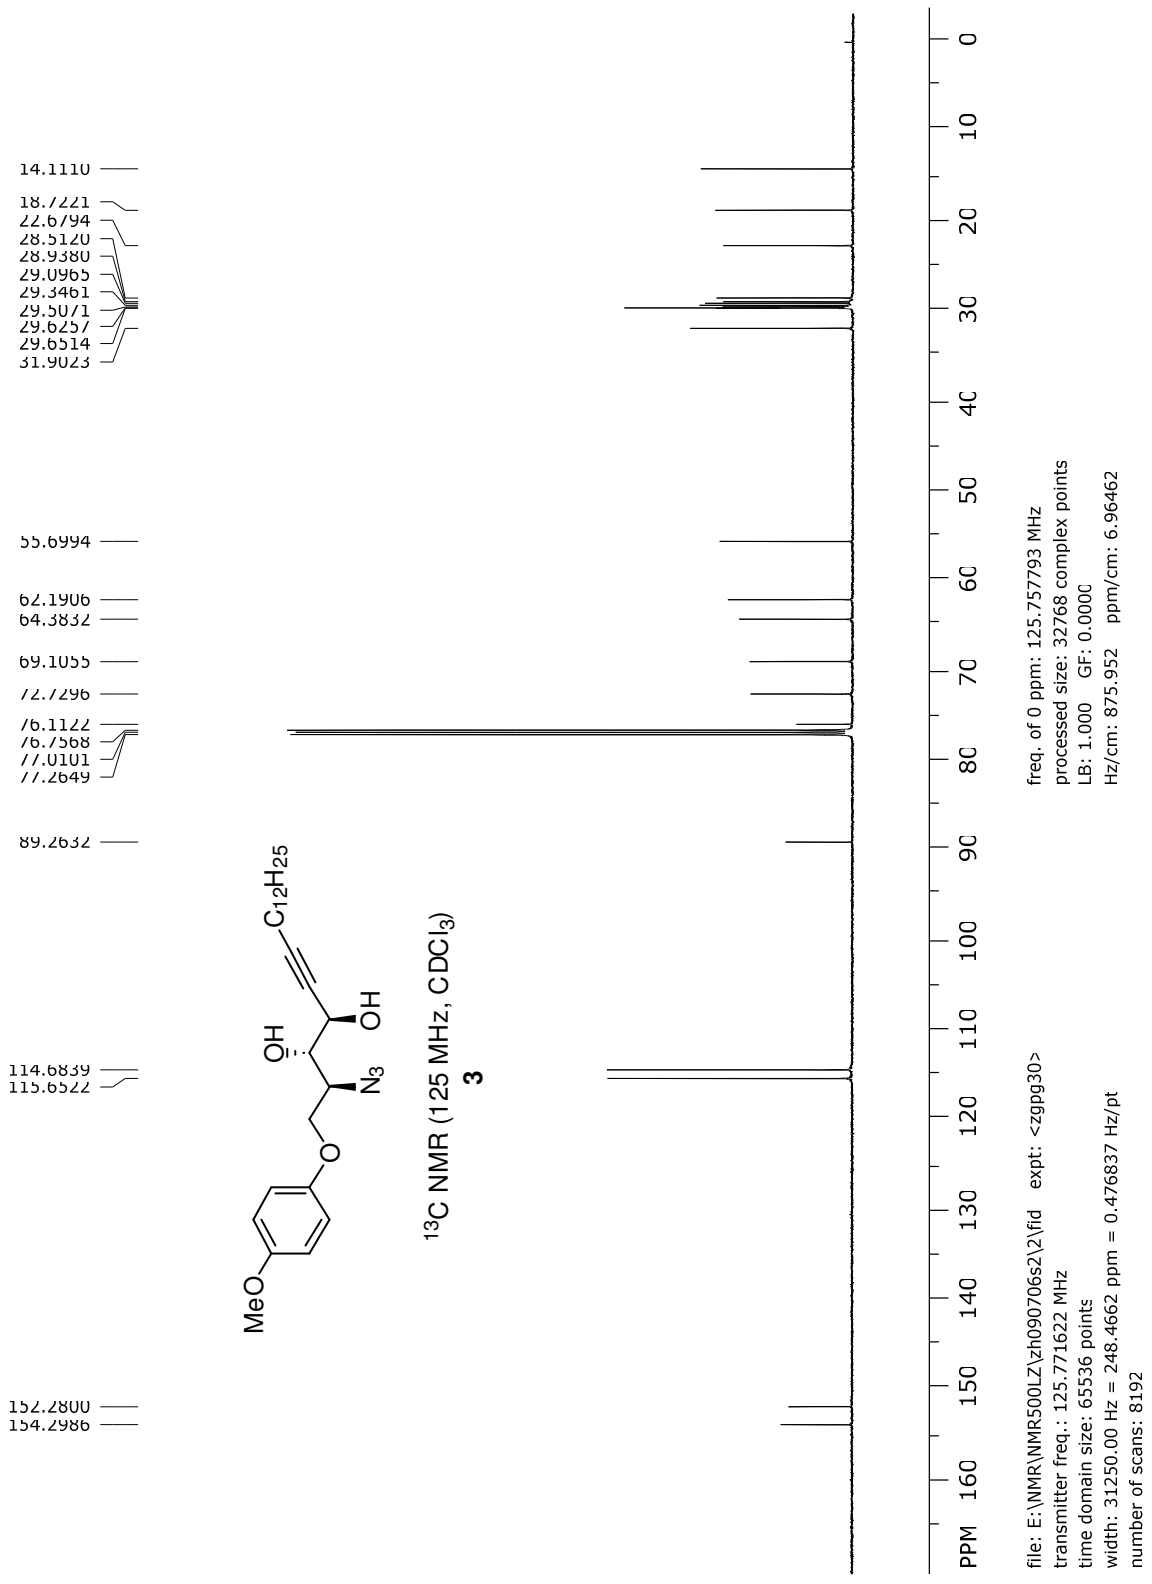



6.7317  
6.7364  
6.7453  
6.7501  
6.7559  
6.7679  
6.7740  
6.7788  
6.7875  
6.7924  
7.2621

4.5184  
4.5188  
4.4977  
4.4913  
4.4517  
4.4311

3.7457

2.7263  
2.7114  
2.6955

1.7177  
1.7038  
1.6886  
1.6731  
1.5986  
1.3468  
1.3232  
1.3113  
1.2969  
1.2821  
1.2532  
0.8932  
0.8796  
0.8654

0.0062  
0.0003  
0.0065

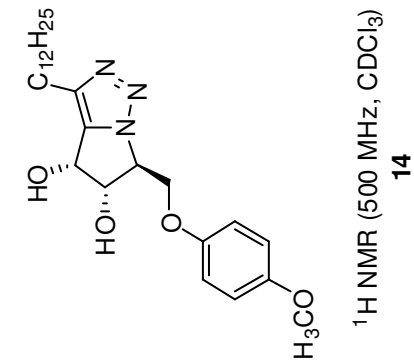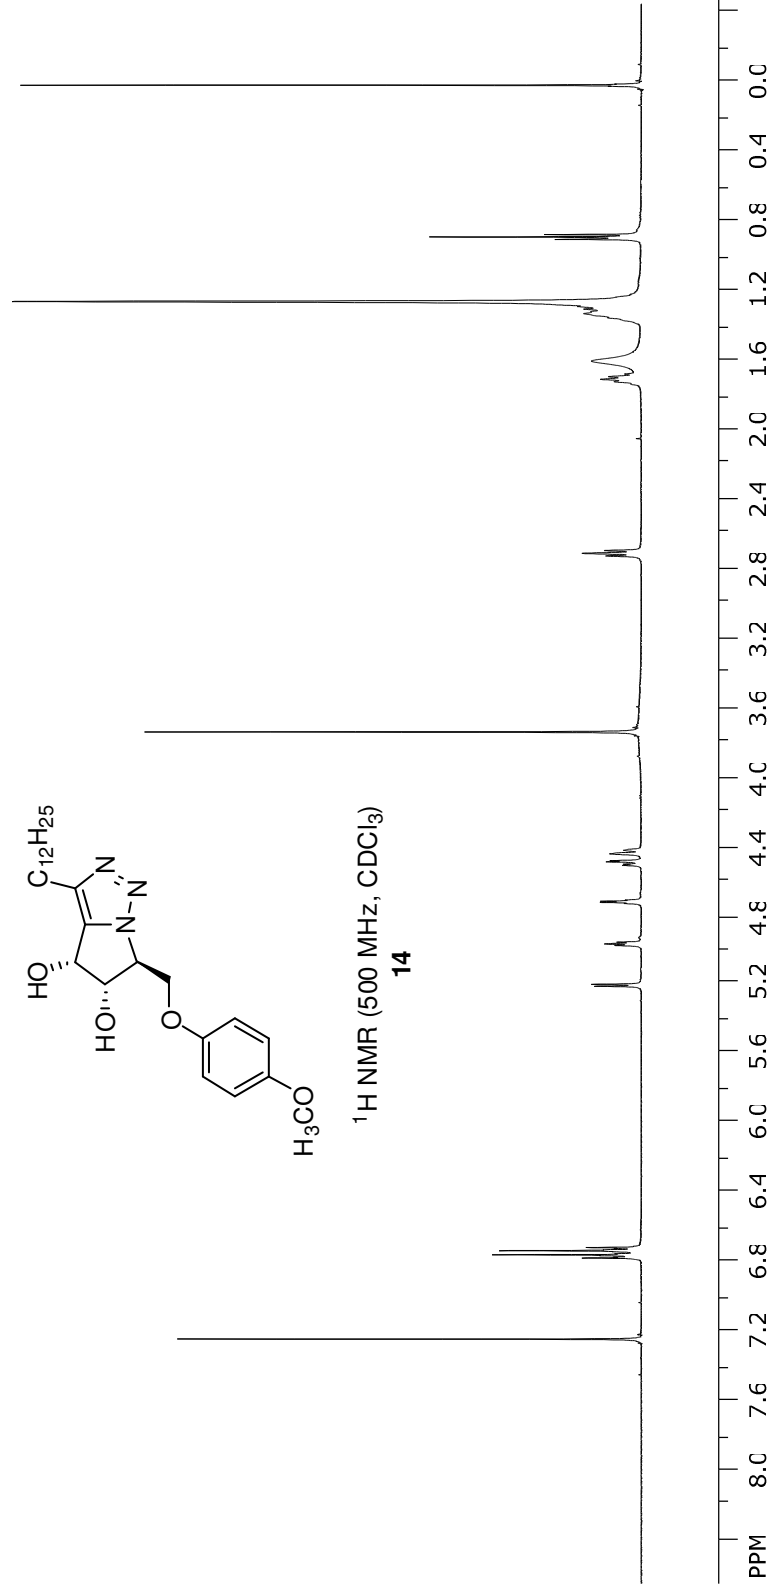

file: D:\NMR 500 LZ\zh090710s2\1\fid exp: <zg30>  
 transmitter freq.: 500.133089 MHz  
 time domain size: 65536 points  
 width: 10330.58 Hz = 20.6557 ppm = 0.157632 Hz/pt  
 number of scans: 16

freq. of 0 ppm: 500.130013 MHz  
 processed size: 32768 complex points  
 LB: 0.300 GF: 0.0000  
 Hz/cm: 183.005 ppm/cm: 0.36591

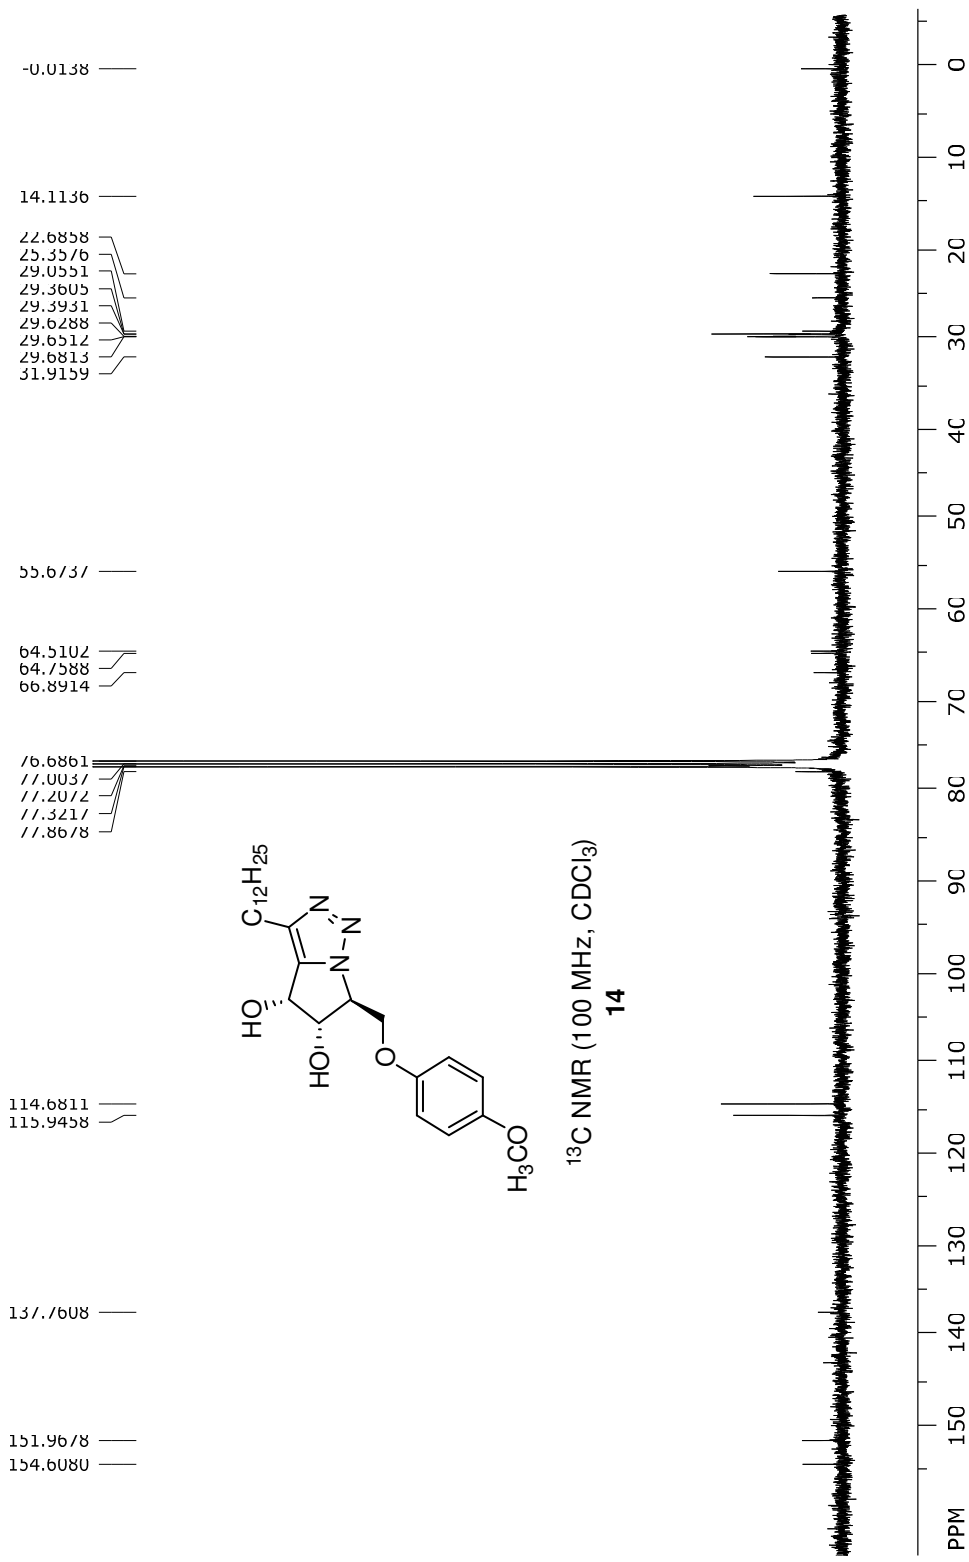

file: D:\NMR 400 LZ\zh090710s2\11\fid exp: <zpgg30>  
 transmitter freq.: 100.622830 MHz  
 time domain size: 65536 points  
 width: 23980.82 Hz = 238.3238 ppm = 0.365918 Hz/pt  
 number of scans: 4096

freq. of 0 ppm: 100.612770 MHz  
 processed size: 32768 complex points  
 LB: 1.000 GF: 0.0000  
 Hz/cm: 686.806 ppm/cm: 6.82555

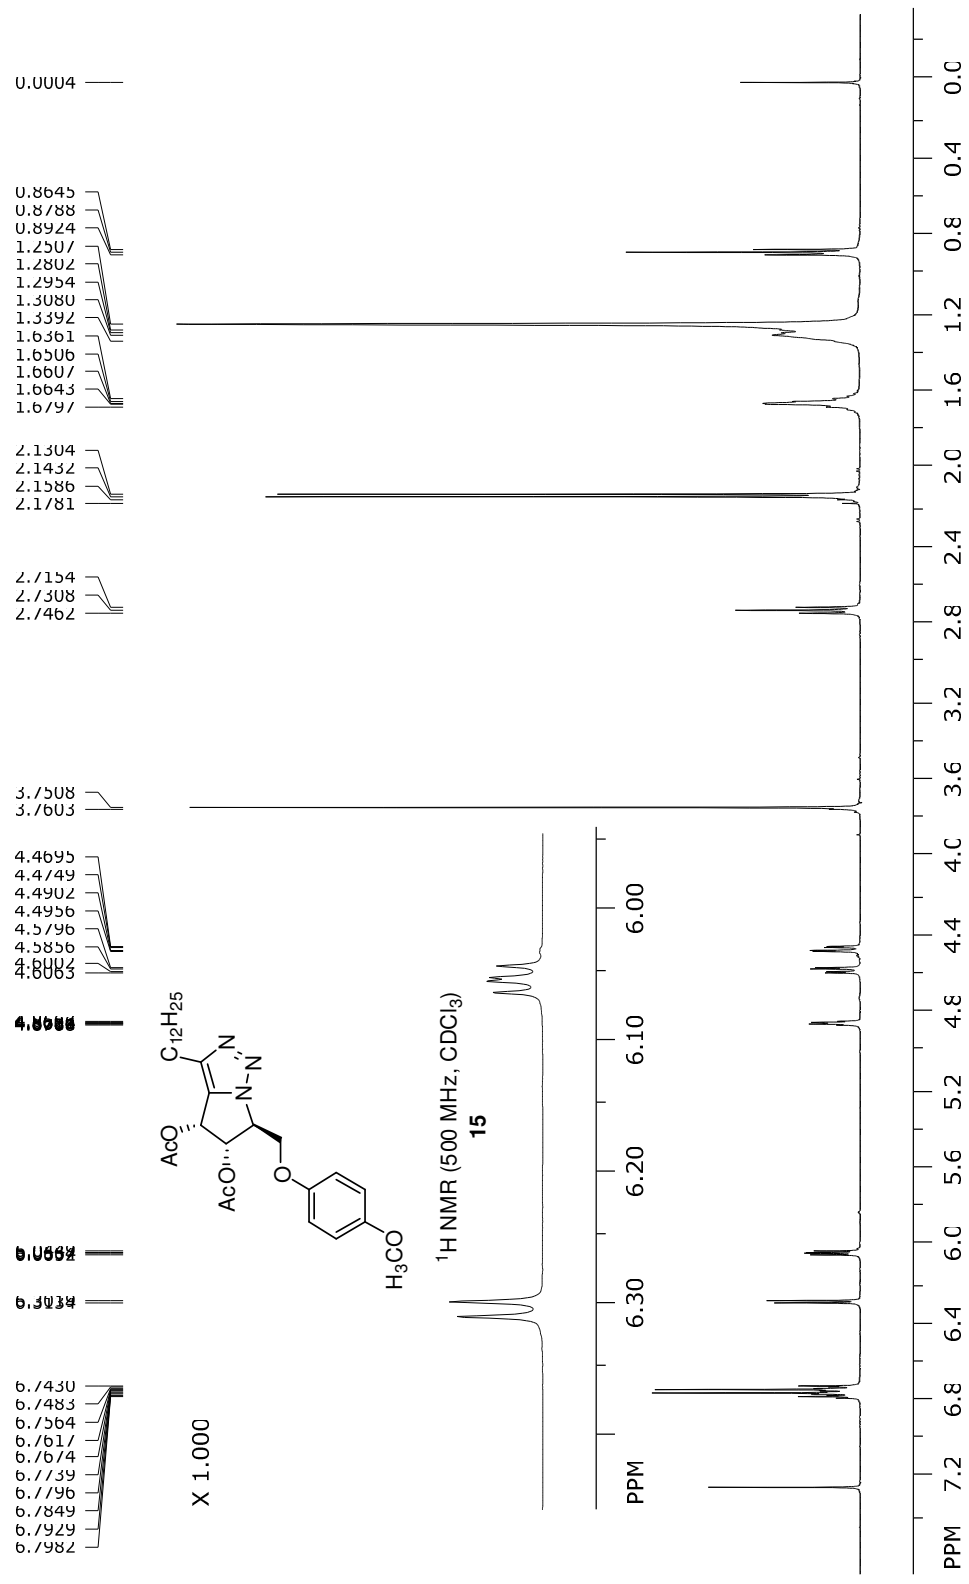

file: D:\NMR 500 LZ\zh090805s2\1\fid expt: <zg30>  
 transmitter freq.: 500.133089 MHz  
 time domain size: 65536 points  
 width: 10330.58 Hz = 20.6557 ppm = 0.157632 Hz/pt  
 number of scans: 16

freq. of 0 ppm: 500.130010 MHz  
 processed size: 32768 complex points  
 LB: 0.300 GF: 0.0000  
 Hz/cm: 161,422 ppm/cm: 0.32276

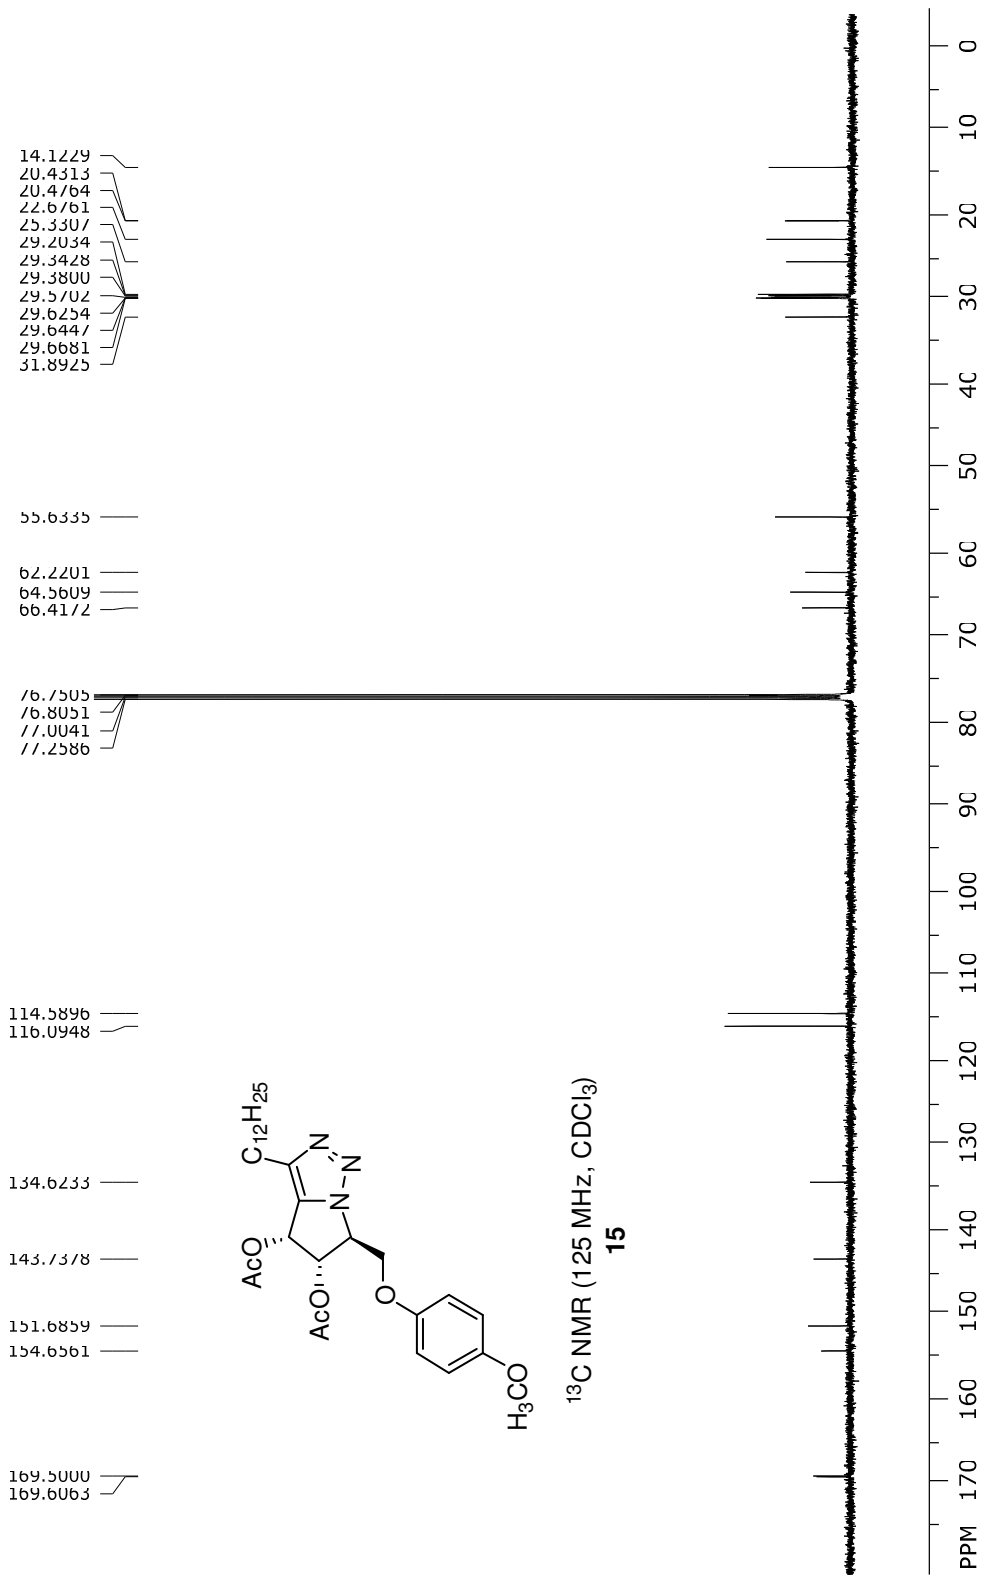

file: D:\NMR 500 LZ\zh090805s2\2\fid expt: <zpgg30>  
 transmitter freq.: 125.771622 MHz  
 time domain size: 65536 points  
 width: 31250.00 Hz = 248.4662 ppm = 0.476837 Hz/pt  
 number of scans: 1024

freq. of 0 ppm: 125.757796 MHz  
 processed size: 32768 complex points  
 LB: 1.000 GF: 0.0000  
 Hz/cm: 931.719 ppm/cm: 7.40802

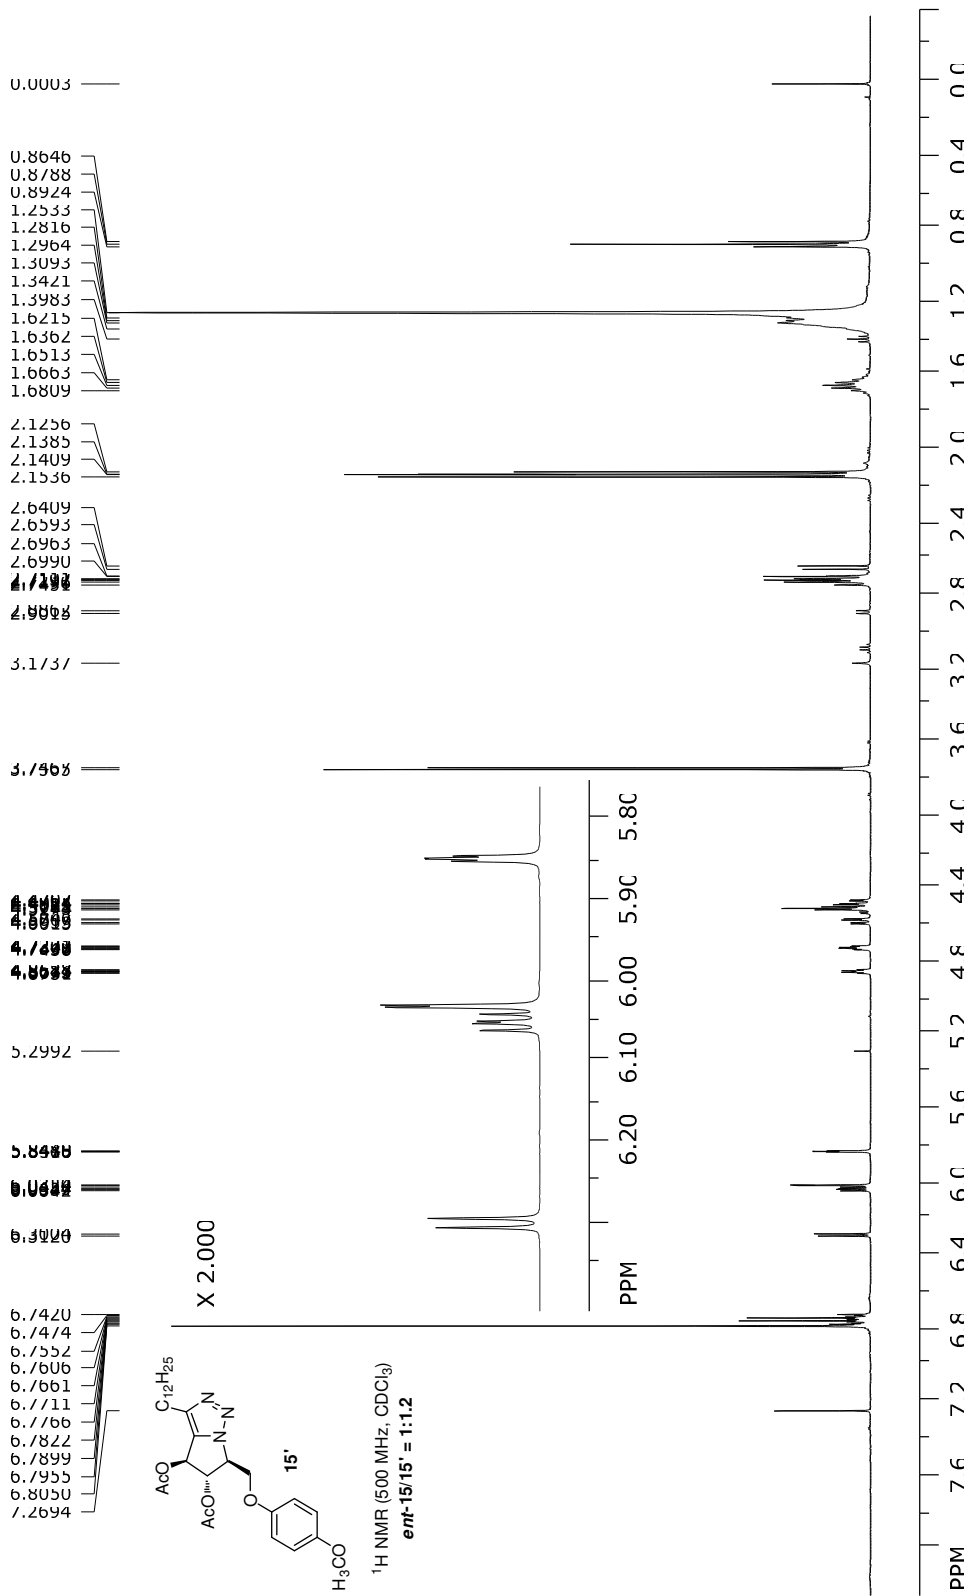

file: E:\NMR\NMR500LZ\zh090226s2\1\fid expt: <zg30>  
 transmitter freq.: 500.133089 MHz  
 time domain size: 65536 points  
 width: 10330.58 Hz = 20.6557 ppm = 0.157632 Hz/pt  
 number of scans: 16  
 freq. of 0 ppm: 500.130009 MHz  
 processed size: 32768 complex points  
 LB: 0.300 GF: 0.0000  
 Hz/cm: 173.113 ppm/cm: 0.34613

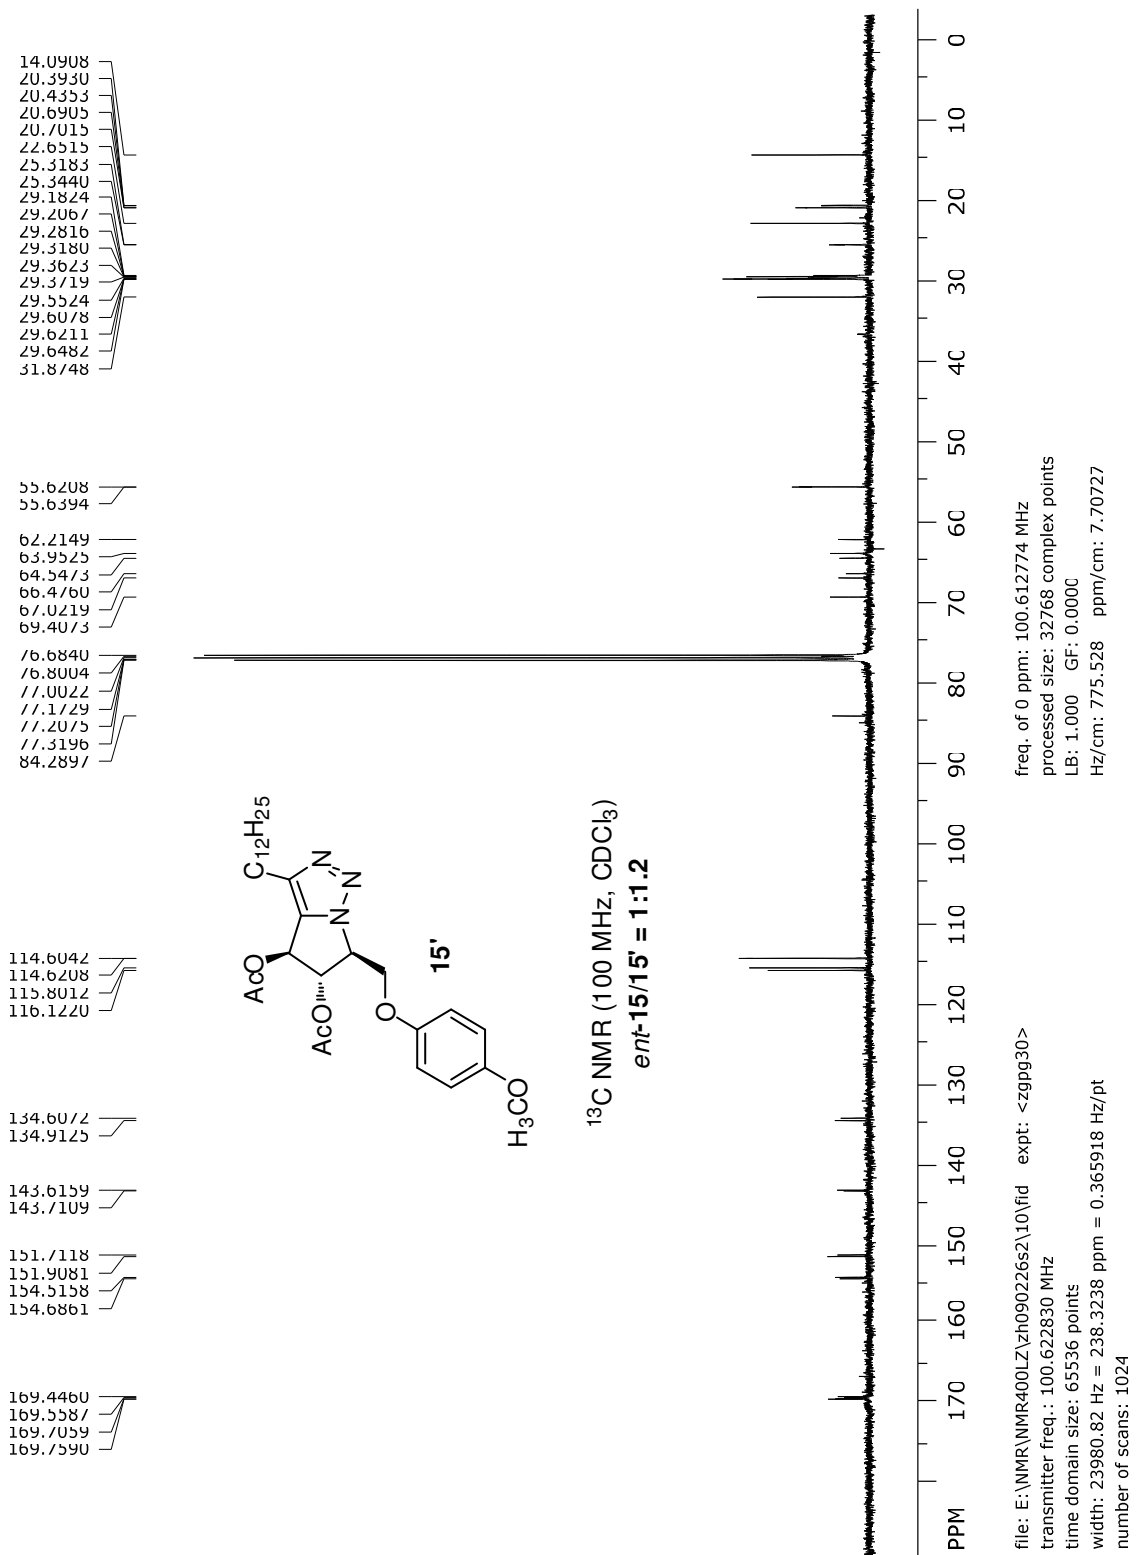

7.3540  
 7.3519  
 7.3387  
 7.3358  
 7.3317  
 7.3221  
 6.9236  
 6.9199  
 6.9162  
 5.0169  
 4.8000  
 4.8000  
 4.8000  
 4.6982  
 4.6952  
 4.6044  
 4.4000  
 4.4000  
 4.2943  
 4.0690  
 3.6206  
 2.2691  
 2.2728  
 2.2813  
 2.2873  
 1.5642  
 1.5510  
 1.5358  
 1.5214  
 1.4234  
 1.4096  
 1.3996  
 1.3943  
 1.2931  
 1.2784  
 1.2512  
 0.8922  
 0.8785  
 0.8643  
 0.0008

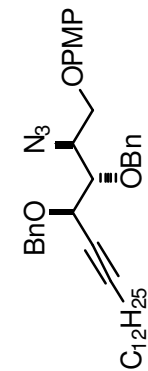

<sup>1</sup>H NMR (500 MHz, CDCl<sub>3</sub>)  
**19**

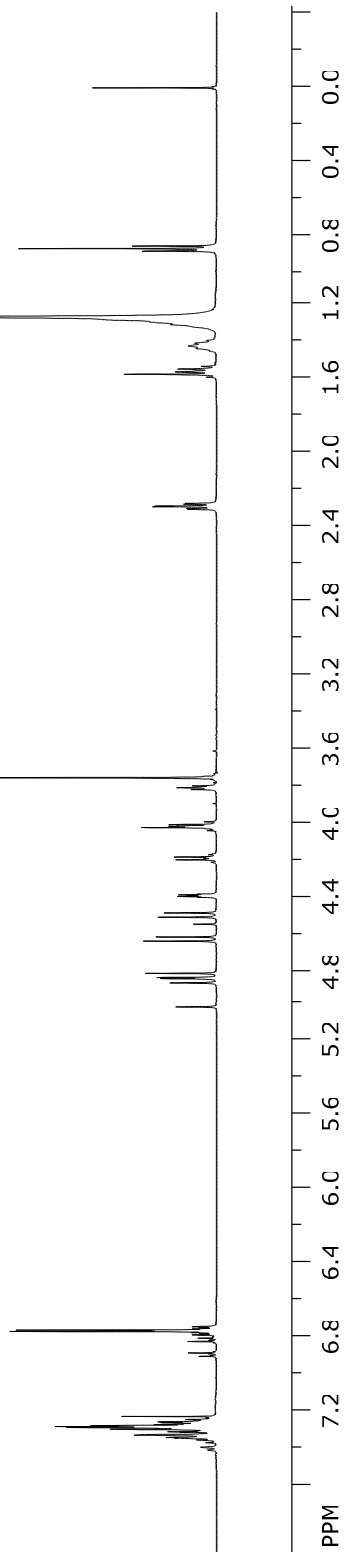

file: E:\NMR\NMR500LZ\zh090921s2\1\fid exp: <zg30>  
 transmitter freq.: 500.133089 MHz  
 time domain size: 65536 points  
 width: 10330.58 Hz = 20.6557 ppm = 0.157632 Hz/pt  
 number of scans: 16

freq. of 0 ppm: 500.130018 MHz  
 processed size: 32768 complex points  
 LB: 0.300 GF: 0.0000  
 Hz/cm: 168.167 ppm/cm: 0.33624

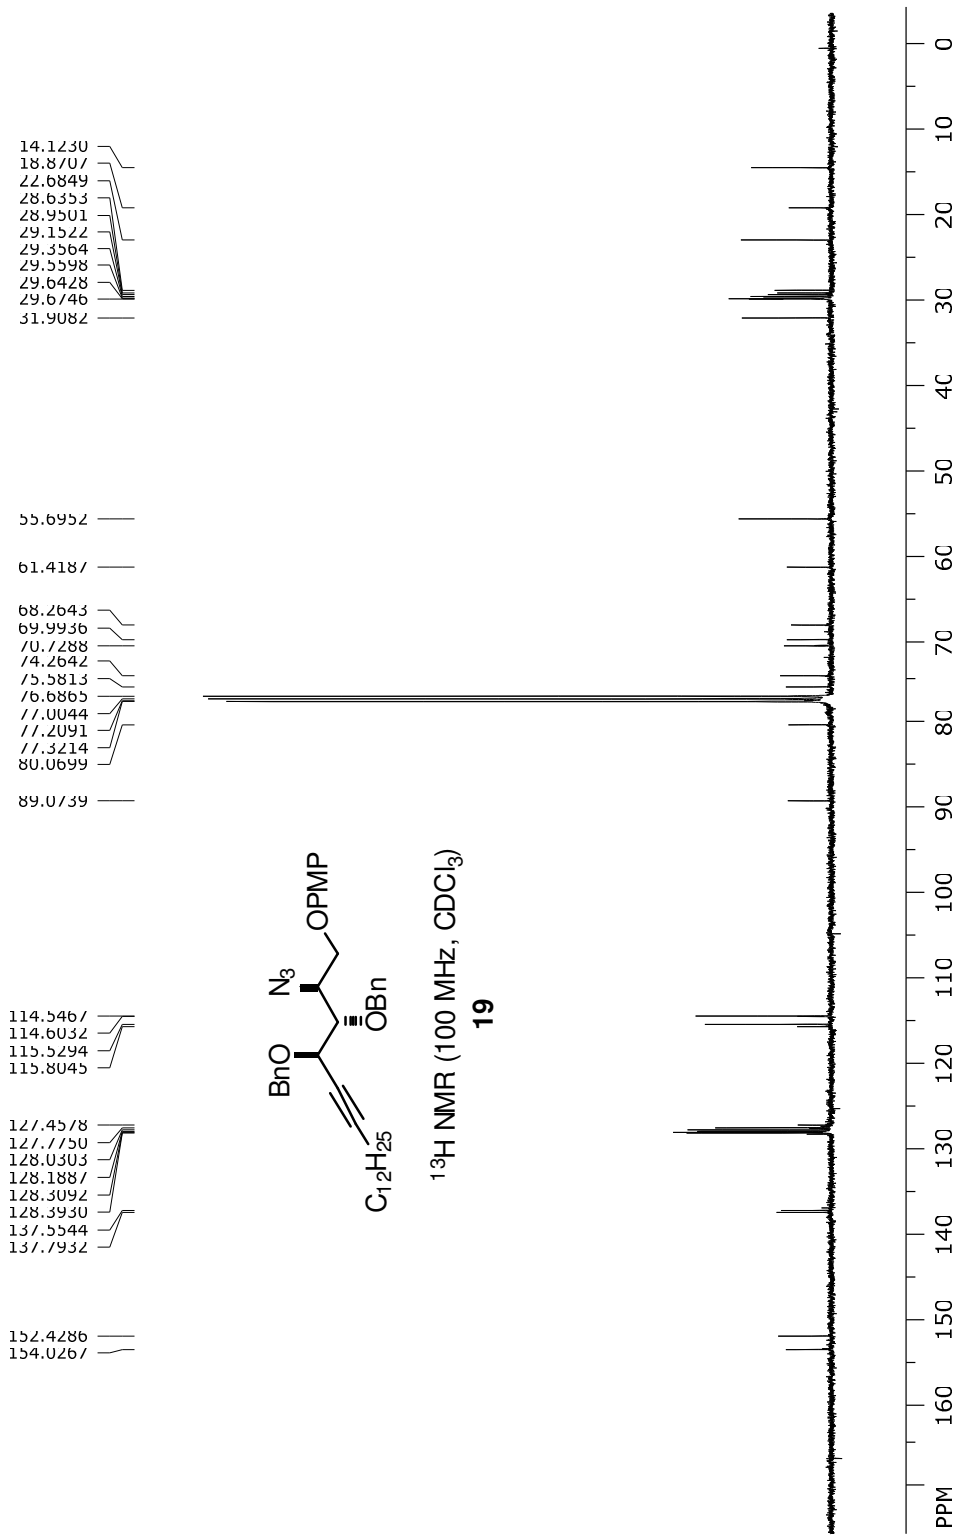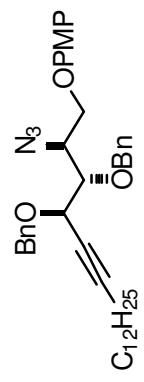

<sup>13</sup>C NMR (100 MHz, CDCl<sub>3</sub>)  
**19**



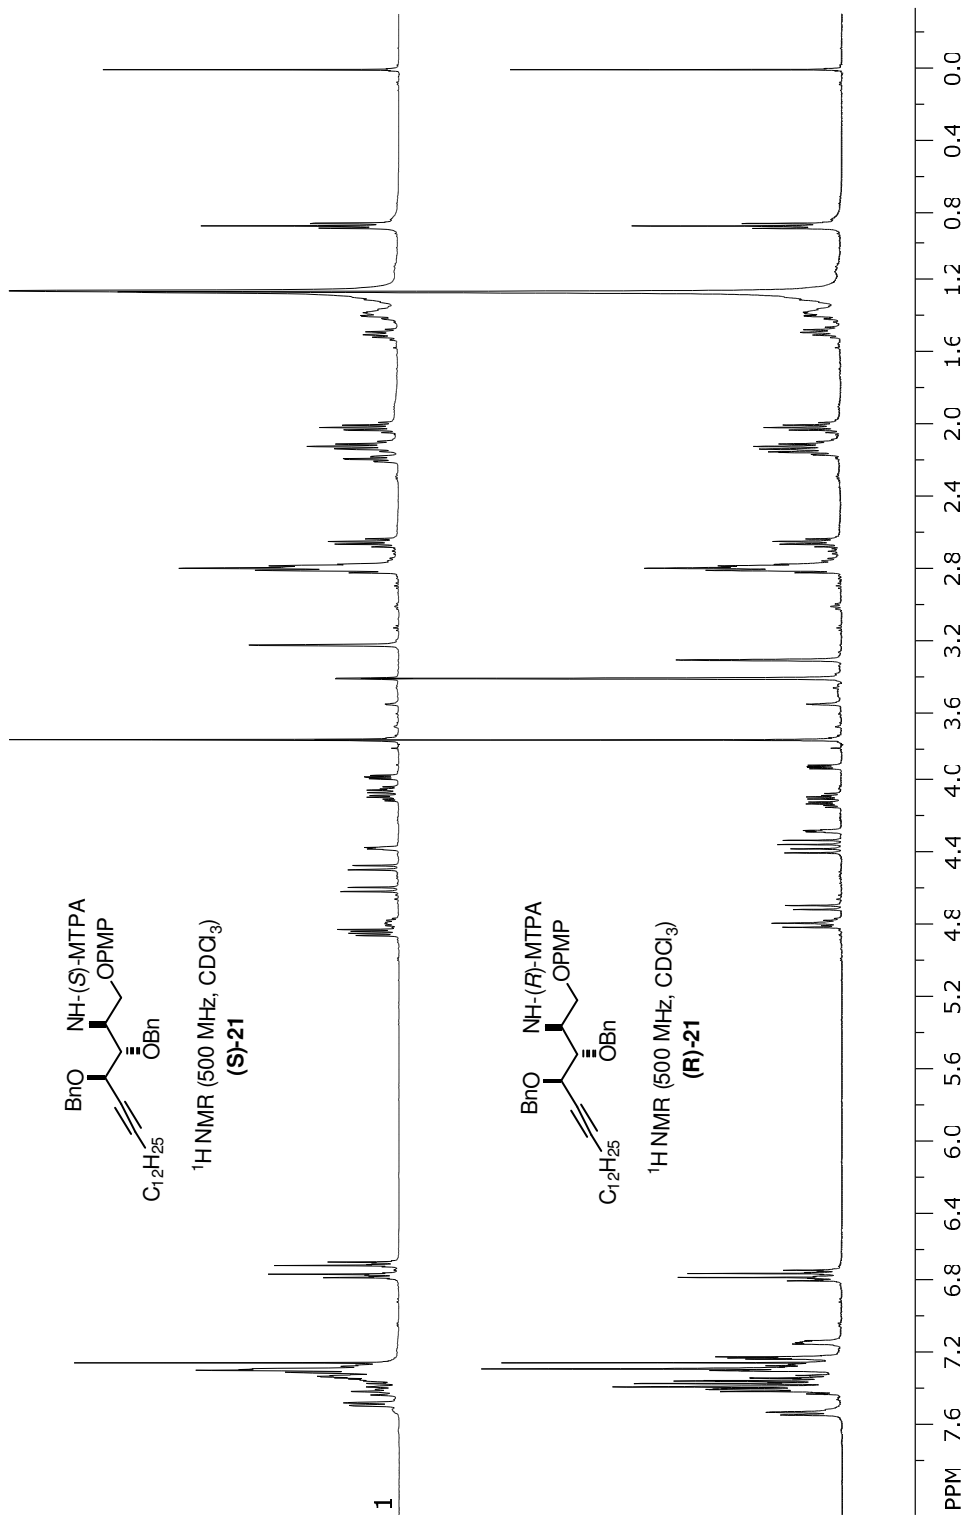

file: E:\NMR\NMR500LZ\zn090929-SCI\1\fid exp: <zg30>  
 transmitter freq.: 500.133089 MHz  
 time domain size: 65536 points  
 width: 10330.58 Hz = 20.6557 ppm = 0.157632 Hz/pt  
 number of scans: 16

freq. of 0 ppm: 500.130014 MHz  
 processed size: 32768 complex points  
 LB: 0.300 GF: 0.0000  
 Hz/cm: 168.617 ppm/cm: 0.33714

*MTPA amide chemical shifts for determination of ee and absolute configuration:*

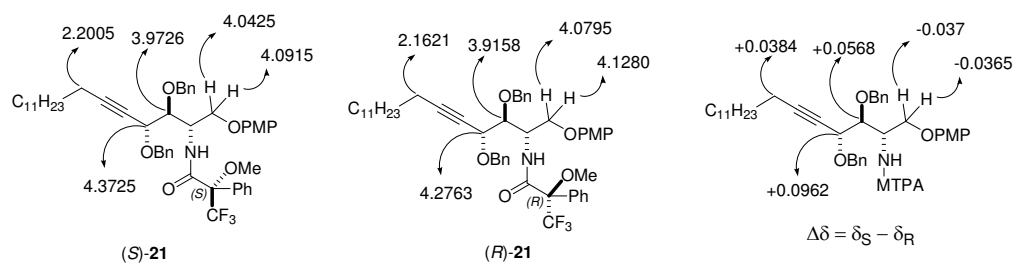

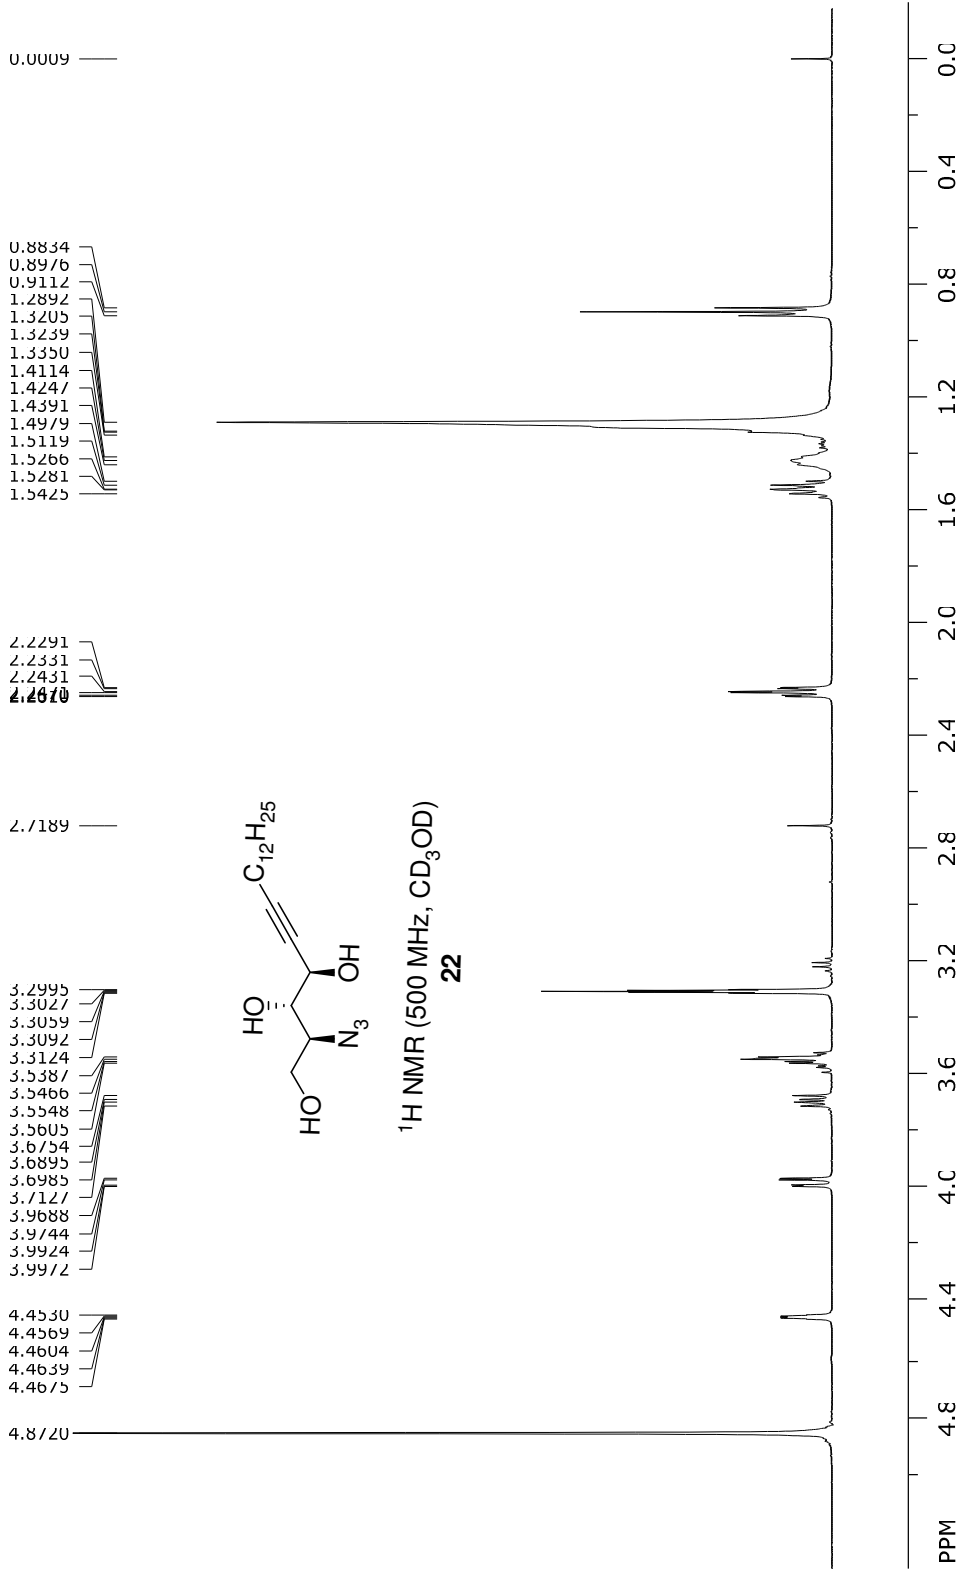

file: E:\NMR\NMR500LZ\zh090709s2\3\fid exp: <zg30>  
 transmitter freq.: 500.133089 MHz  
 time domain size: 65536 points  
 width: 10330.58 Hz = 20.6557 ppm = 0.157632 Hz/pt  
 number of scans: 16

freq. of 0 ppm: 500.130013 MHz  
 processed size: 32768 complex points  
 LB: 0.300 GF: 0.0000  
 Hz/cm: 110.608 ppm/cm: 0.22116

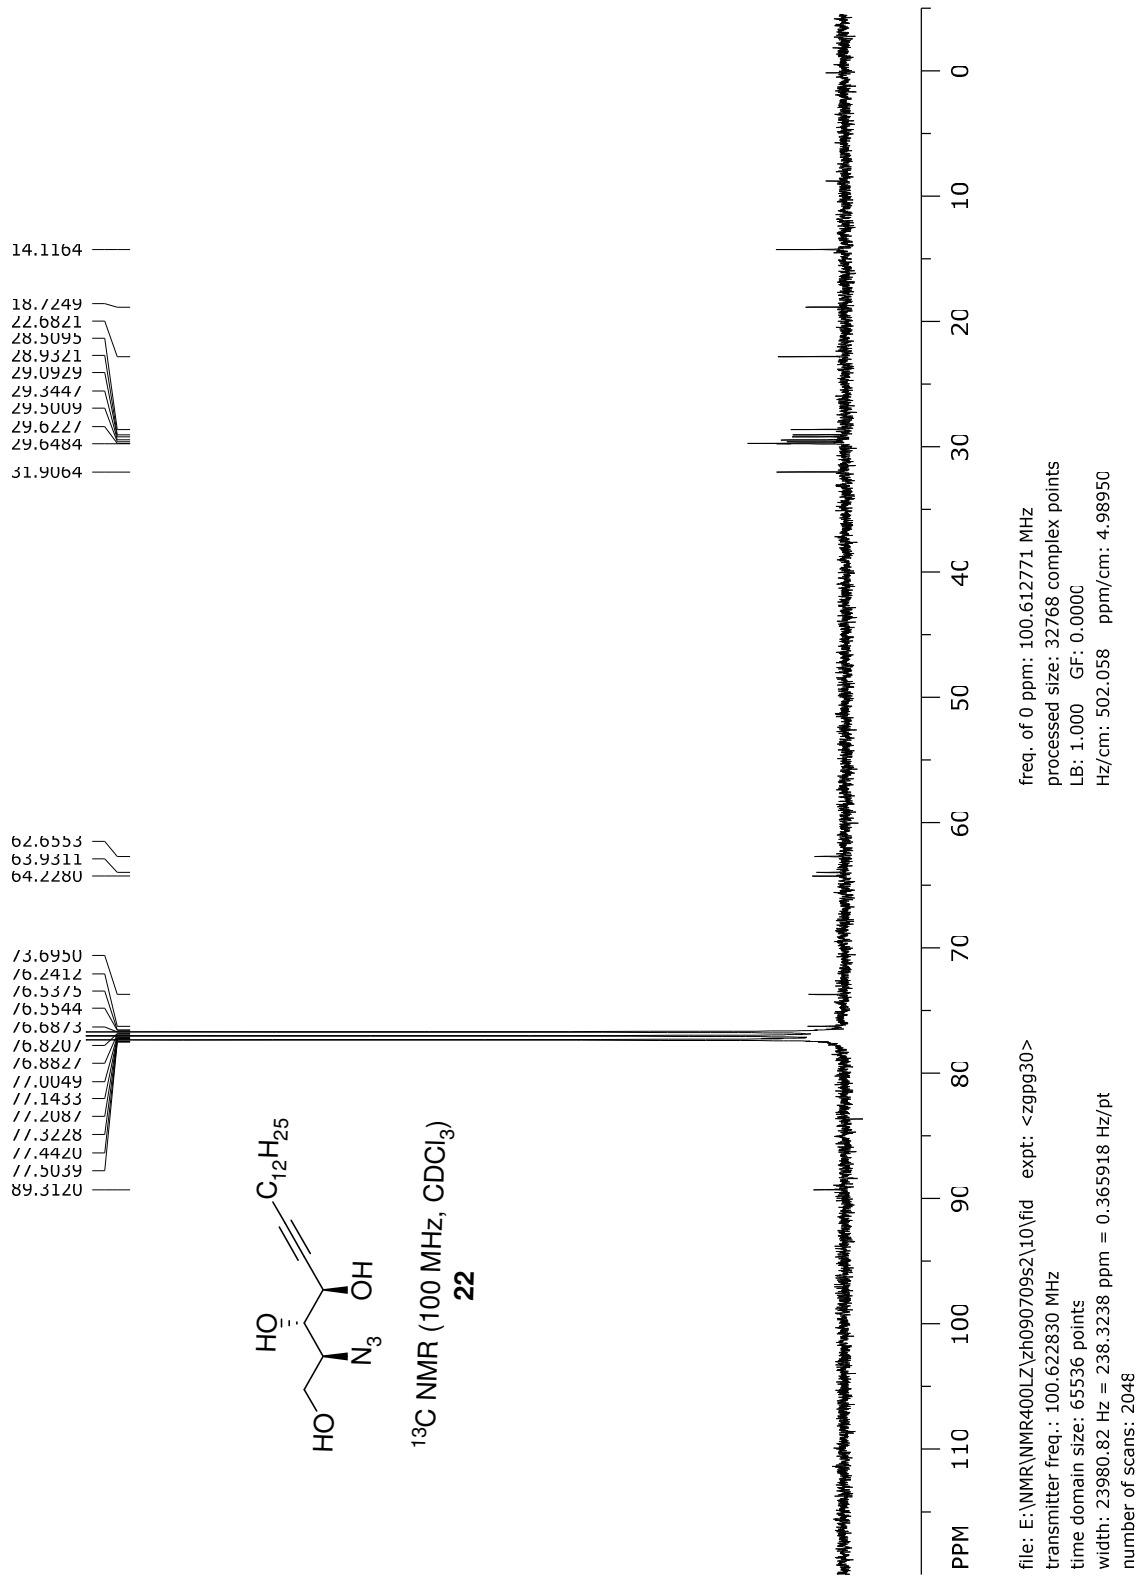

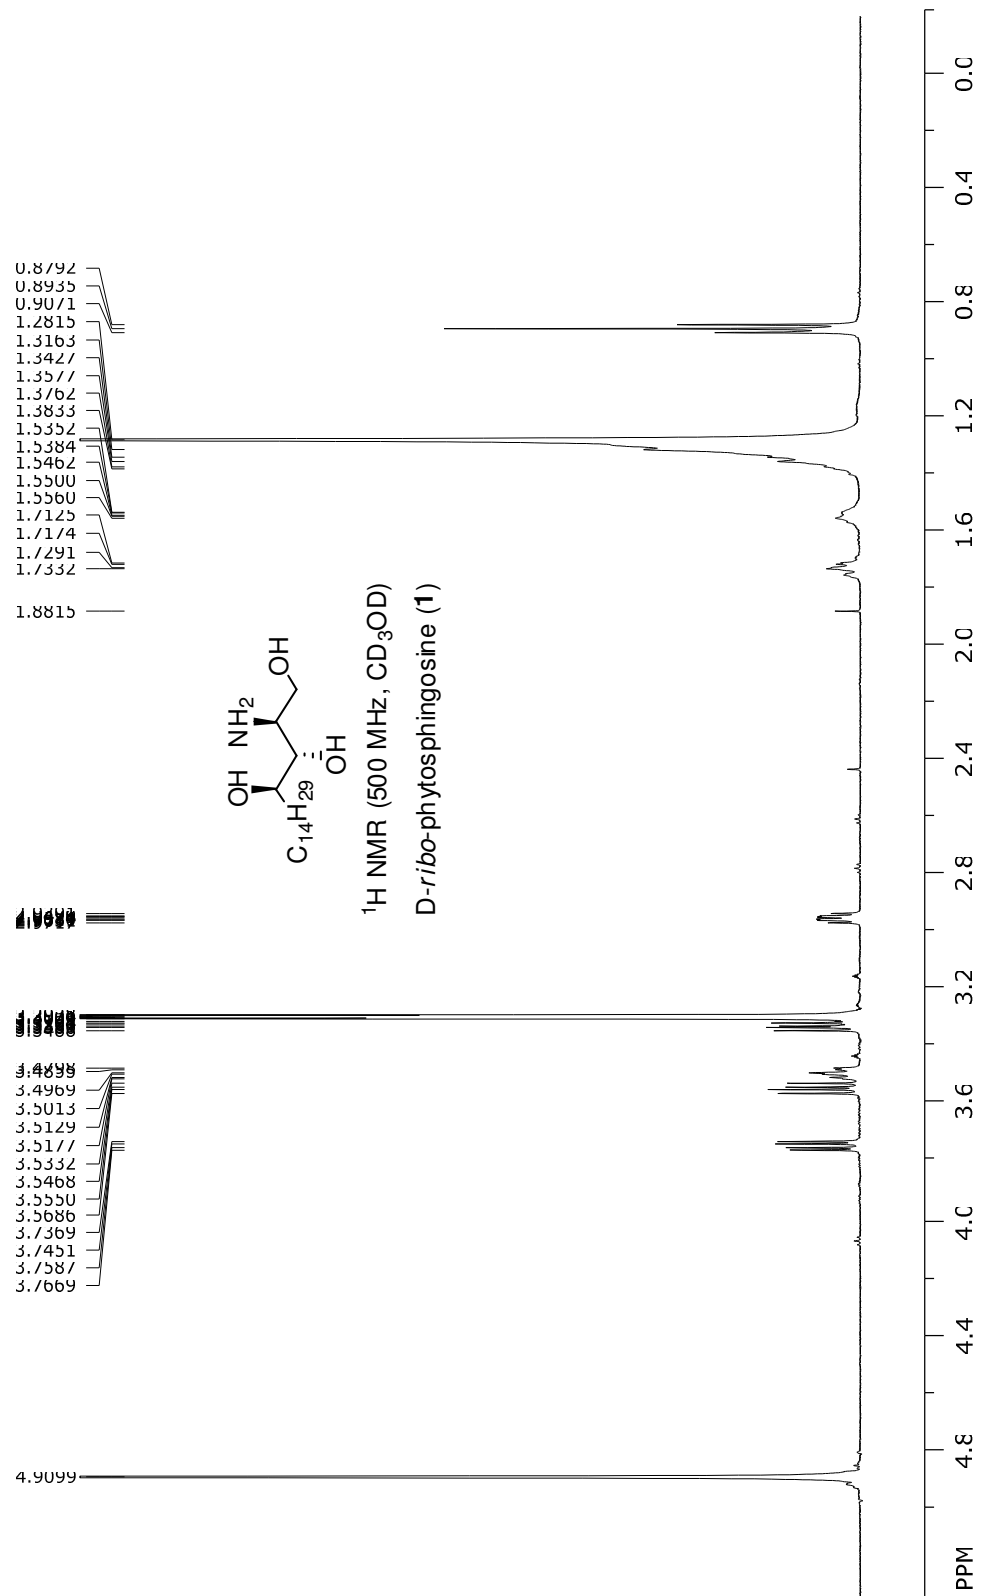

file: E:\NMR\_500\_LZ\zh0908s2\3\fid exp: <zg30>  
transmitter freq.: 500.133089 MHz  
time domain size: 65536 points  
width: 10330.58 Hz = 20.6557 ppm = 0.157632 Hz/pt  
number of scans: 16  
freq. of 0 ppm: 500.130016 MHz  
processed size: 32768 complex points  
LB: 0.300 GF: 0.0000  
Hz/cm: 110.546 ppm/cm: 0.22103

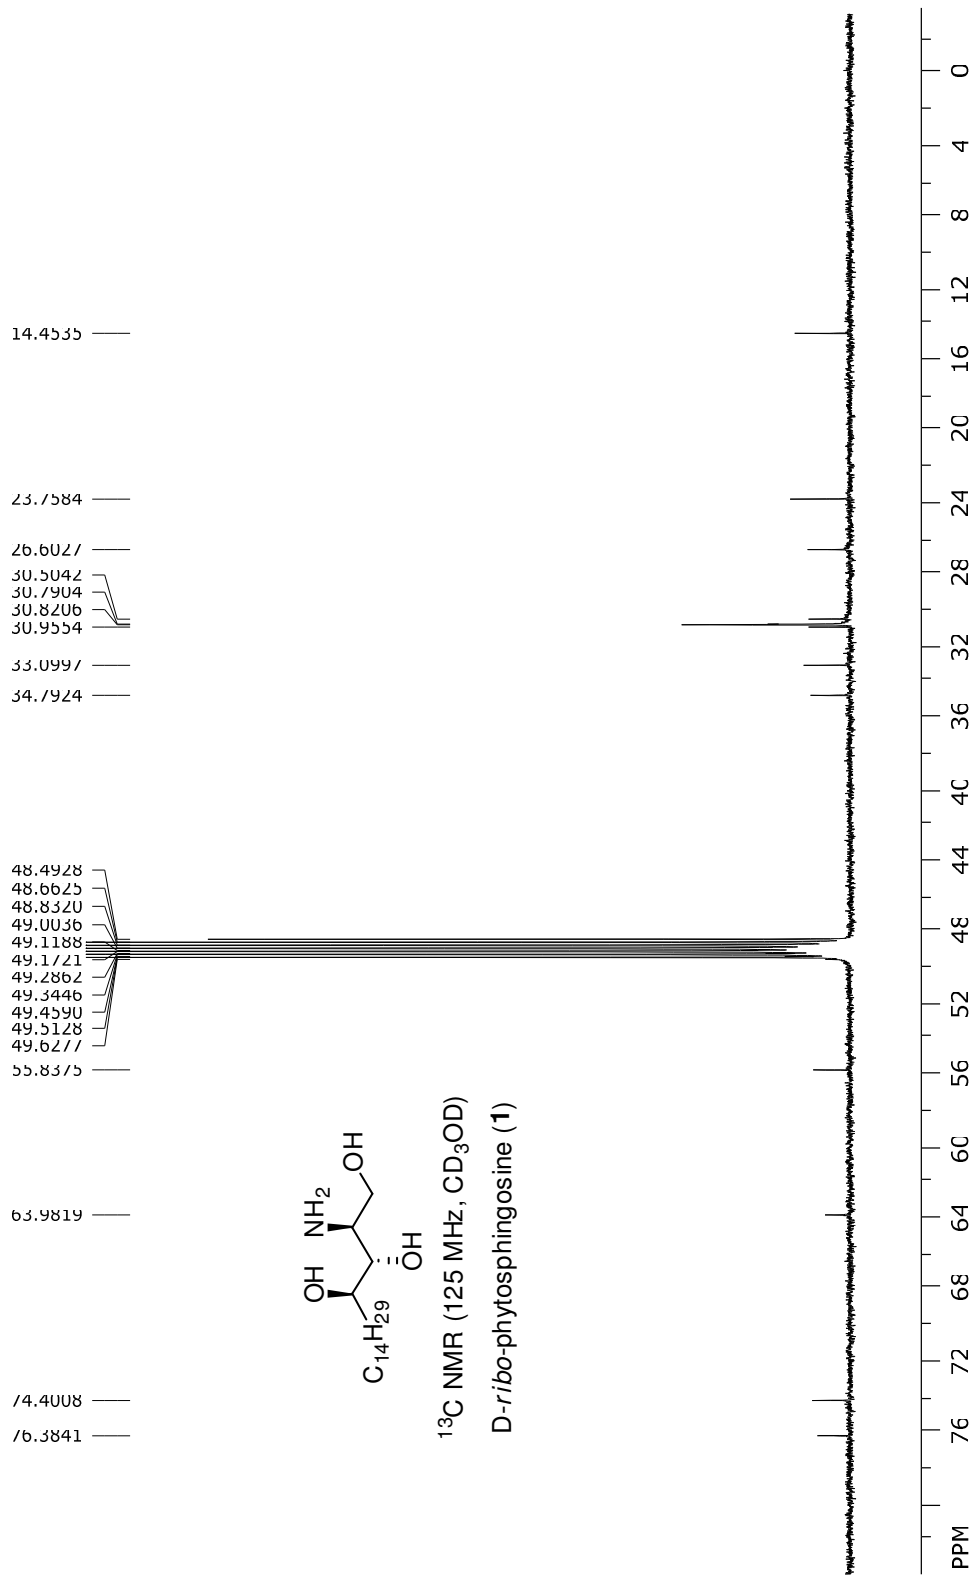

freq. of 0 ppm: 125.757612 MHz  
 processed size: 32768 complex points  
 LB: 1.000 GF: 0.0000  
 Hz/cm: 440.844 ppm/cm: 3.50512

file: E:\NMR 500 LZ\zh0908s2\4\fid expt: <zpgg30>  
 transmitter freq.: 125.771622 MHz  
 time domain size: 65536 points  
 width: 31250.00 Hz = 248.4662 ppm = 0.476837 Hz/pt  
 number of scans: 12288

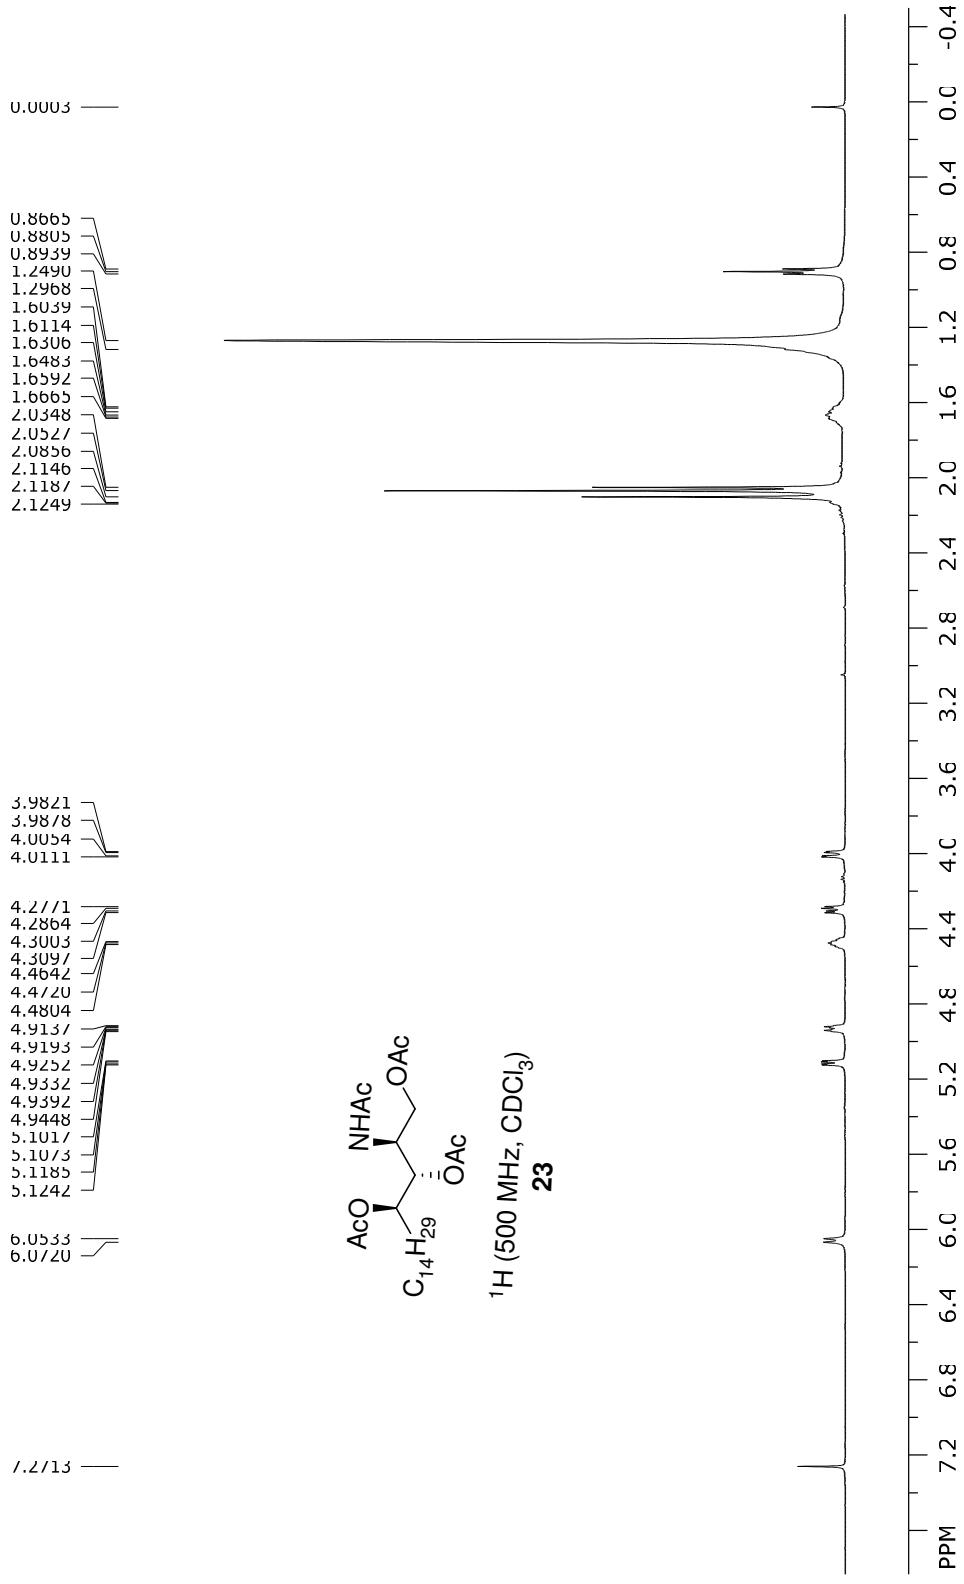

file: E:\NMR 500 LZ\zh0908s3\2\fid expt: <zg30>  
 transmitter freq.: 500.133089 MHz  
 time domain size: 65536 points  
 width: 10330.58 Hz = 20.6557 ppm = 0.157632 Hz/pt  
 number of scans: 16

freq. of 0 ppm: 500.130008 MHz  
 processed size: 32768 complex points  
 LB: 0.300 GF: 0.0000  
 Hz/cm: 166.909 ppm/cm: 0.33373

14.1242  
 20.7540  
 20.7875  
 21.0581  
 22.6778  
 23.2916  
 25.4931  
 28.0209  
 29.2758  
 29.3482  
 29.4841  
 29.5689  
 29.6127  
 29.6385  
 29.6671  
 31.9039

169.7894  
 170.1139  
 170.8866  
 171.2406

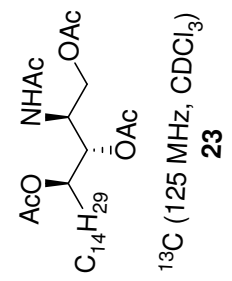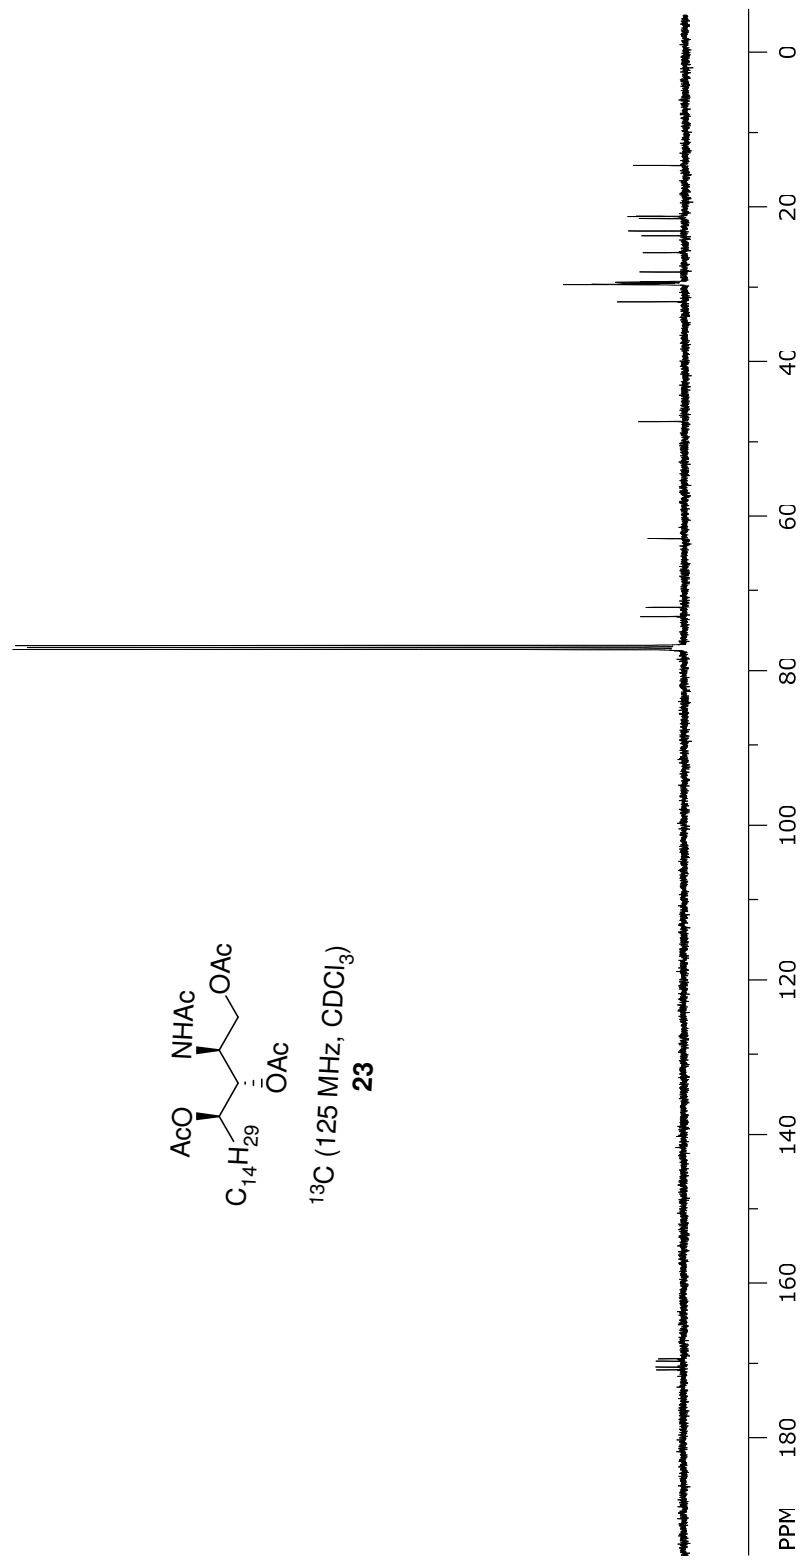

freq. of 0 ppm: 125.757795 MHz  
 processed size: 32768 complex points  
 LB: 1.000 GF: 0.0000  
 Hz/cm: 1010.739 ppm/cm: 8.03630

file: E:\NMR 500 LZ\zh0908s3\3\fid exp: <zpgg30>  
 transmitter freq.: 125.771622 MHz  
 time domain size: 65536 points  
 width: 31250.00 Hz = 248.4662 ppm = 0.476837 Hz/pt  
 number of scans: 1024



7.2386  
7.2381  
7.2982  
7.3028  
7.3070  
7.3103  
7.3158

4.8729  
4.8724  
4.8231  
4.8005  
4.6450  
4.6225  
4.5151  
4.4916  
4.3957  
4.3914  
4.3871

3.7382  
3.7480  
3.7574  
3.7719  
3.7808  
3.7911

2.2594  
2.2631  
2.2736  
2.2774  
2.2878  
2.2915

1.2543  
1.2938  
1.4034  
1.5289  
1.5440  
1.5588

0.8649  
0.8791  
0.8927

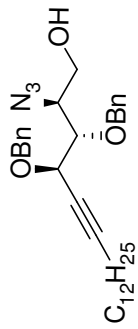

<sup>1</sup>H NMR (500 MHz, CDCl<sub>3</sub>)  
4

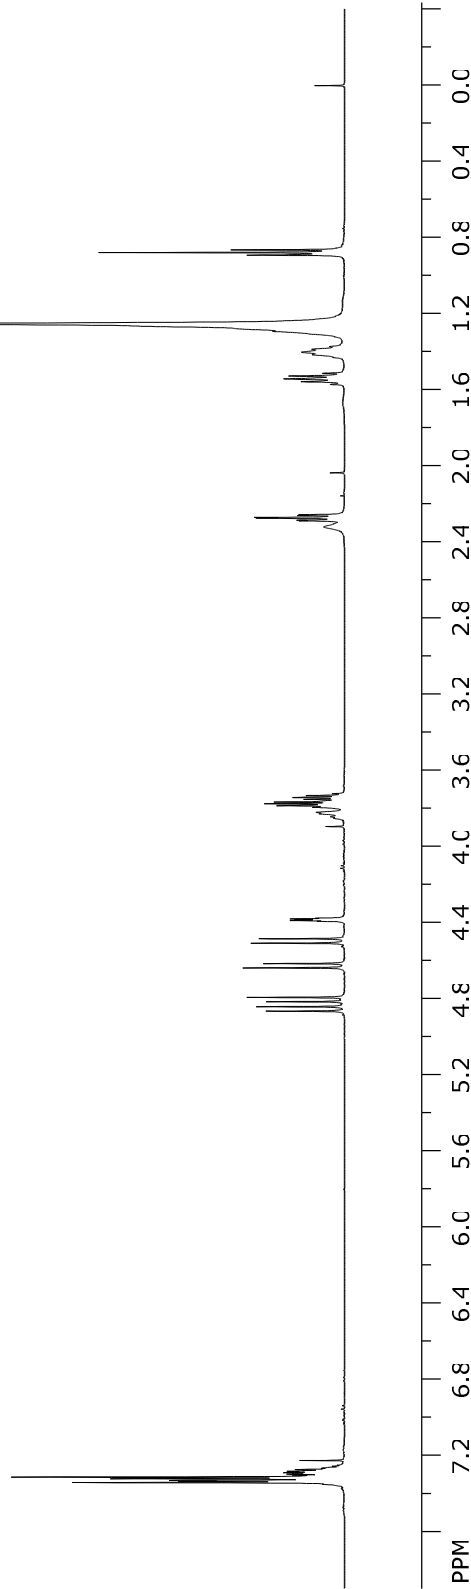

file: D:\NMR 500 LZ\zh090930s2\1\fid expt: <zg30>  
transmitter freq.: 500.133089 MHz  
time domain size: 65536 points  
width: 10330.58 Hz = 20.6557 ppm = 0.157632 Hz/pt  
number of scans: 16

freq. of 0 ppm: 500.130025 MHz  
processed size: 32768 complex points  
LB: 0.300 GF: 0.0000  
Hz/cm: 166.368 ppm/cm: 0.33265

14.1028  
18.7964  
22.6543  
28.5546  
28.9026  
29.1006  
29.3230  
29.5177  
29.6039  
29.6352  
31.8707

62.1133  
63.0453  
69.5667  
70.6883  
73.8879  
75.2766  
76.7482  
77.0032  
77.2566  
80.8422

89.3429

127.8530  
127.8896  
128.0258  
128.1055  
128.3828  
128.3957  
137.2628  
137.5207

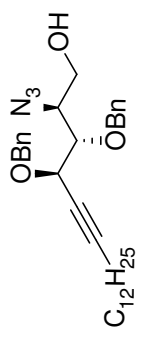

$^{13}C$  NMR (100 MHz,  $CDCl_3$ )  
**4**

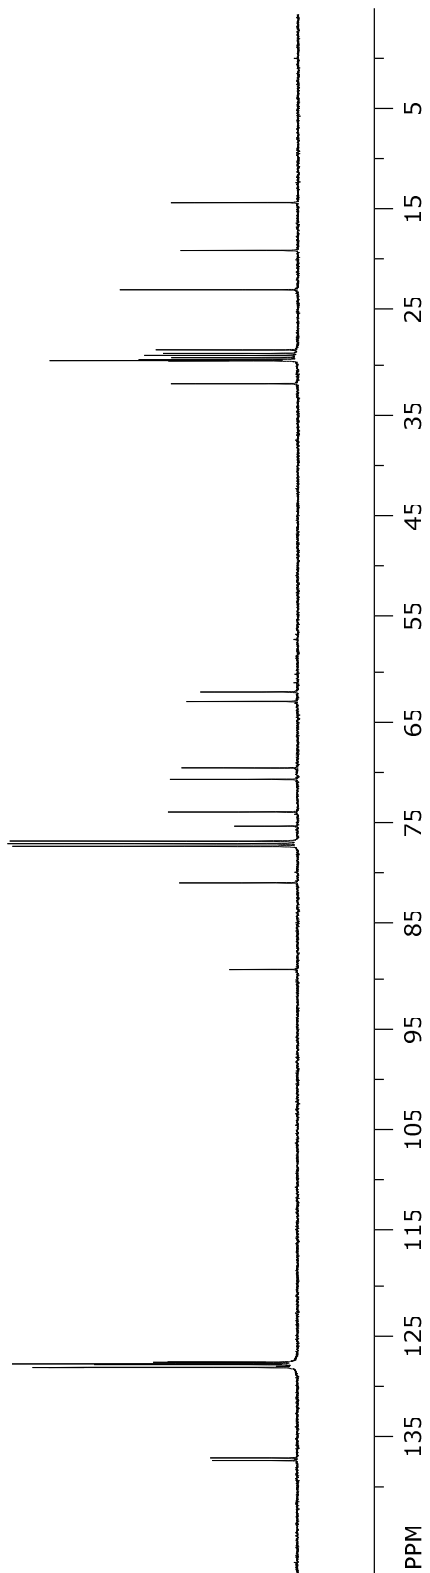

file: D:\NMR 500 LZ\zh090930s2\2\fid exp: <zpgg30>  
transmitter freq.: 125.771622 MHz  
time domain size: 65536 points  
width: 31250.00 Hz = 248.4662 ppm = 0.476837 Hz/pt  
number of scans: 1024

freq. of 0 ppm: 125.757802 MHz  
processed size: 32768 complex points  
LB: 1.000 GF: 0.0000  
Hz/cm: 769.859 ppm/cm: 6.12108
